# Supplementary material for: Distinct Sympathoneural and Cardiovagal Domains of Arterial Baroreflex Function in Autonomic Synucleinopathies
Source: Research Square preprint supplement (doi:10.21203/rs.3.rs-9248308/v1), 2026-05-11
Supplement: Supplementary file 2 [file 99a55692b567564f6fd55d23.xlsx]

## Sheet: Baro. ms Data
PATID	Protocol	Group	Age	≥60	Race	Sex	Phys PRT	Phys BRS-A	Phys Log Baro. Area II	Phys Log Baro. Area III	Phys Log Baro. Area Total	Phys ∆BPs Val Phase II	Phys Inc. in HR Val	Phys Baroslope	Phys SDRR	Phys log BL TP	Phys log BL LF	Phys log BL HF	Phys ∆HR/∆BPs Ortho	Phys Fx∆FVR Ortho	Phys Fx∆TPR Ortho	NC Fx∆NE Ortho	NC Fx∆DHPG Ortho
			years	Yes=1	W=1	M=1	sec	mmHg/sec	mm Hg-sec	mm Hg-sec	mm Hg-sec	mm Hg	bpm	ms/mm Hg	ms	ms^2	ms^2	ms^2	bpm/mm Hg	Nexfin/Nova	Nexfin/Nova
0CNCS 0299	03N0007	Control HV	43.1841	0	1	1	2.69	15.2007	1.98138	2.44918	2.57646	-30.98	0.0338	0.68		3.65277	3.13513	3.27887				0.59082	0.123958
CNCS 00427	03N0007	Control HV	56.0958	0	0	0	3.79	10.07	2.15912	1.82607	2.3248	-33.74	8.5	2.9773		3.05953	2.58723	2.4629				1.03863	0.0547084
CNCS 00475	03N0007	Control HV	53.128	0	0	0	1.19	16.98	2.13351	0.838849	2.155	-53.76	12.79	-0.94		2.96567	2.58253	2.05205				0.541499	0.133199
CNCS 00627	03N0004	Control HV	24.1342	0	0	0	3.89	12.63	2.21893	1.86445	2.37793	-47.06	6.74	2.36		3.46382	2.5853	2.2835				0.962901	0.0797843
CNCS 00628	03N0004	Control HV	31.781	0	1	1	3.09	5.86408	1.50292	1.38164	1.74753	-47.44	25.37	1.8415		3.20472	2.6452	2.31253				1.1643	0.0863782
CNCS 00642	03N0004	Control HV	34.1684	0	1	0	2.89	8.12457	1.18771	1.51107	1.67984	-38.02	6.83	3.8232		3.98607	3.52271	3.05654				-0.00259061	0.352243
CNCS 00812	00N0008	Control HV	53.8015	0	1	0	2.34	22.12	2.42473	1.6464	2.49166	-20.07	17.331	9.9527		3.92443	2.65722	2.30528				1.22422	0.209581
CNCS 00941	00N0008	Control HV	59.5784	0	1	0	2.345	19.9915	2.38587	2.07654	2.55921	-26.39	17.9	9.1318		3.79253	3.16867	3.2752				1.18696	0.208086
CNCS 01017	94N0186	Control HV	52.4819	1	1	1	3.395	19.5582	1.82259	2.53802	2.6145	-65.2	19	3.7938		2.76477	2.5358	2.25188
CNCS 01077	00N0008	Control HV	54.7762	0	1	1	2.04	6.79412	1.74685	1.65089	2.00255					3.66399	2.85751	2.47625
CNCS 01080	94N0186	Control HV	44.4298	0	1	0	1.895	1.895	2.45207	2.21042	2.64887	-40.62	21.9	4.5615		3.57022	2.93917	2.33304
CNCS 01148	94N0186	Control HV	48.5613	0	0	0	1.24	15.45	1.25212	0.833784	1.39252	-35.55	12.378	4.35		3.26689	2.85395	2.07453				0.482703	0.22884
CNCS 01155	94N0186	Control HV	43.3895	0	0	1	1.795	22.8412	2.56395	1.71728	2.62174	-65	20.8	5.782		4.10662	3.8067	3.26544
CNCS 01188	94N0186	Control HV	37.7029	0	0	1	1.995	21.589	2.4596	2.32992	2.70061	-39.61	10	4.0585		2.88064	2.42488	2.0569
CNCS 01207	94N0186	Control HV	35.4004	0	1	1	2.29	14.0699	1.56157	1.52836	1.84631					3.48657	2.8537	2.18184
CNCS 01208	94N0186	Control HV	23.7673	0	0	1	3.37	13.6202	2.57546	2.0084	2.6796					3.21992	2.61448	2.82666
CNCS 01211	94N0186	Control HV	23.4333	0	1	1	2.595	16.5973	2.38822	2.25631	2.62828	-28.53	8.4	4.2289		3.28966	2.97667	2.4417
CNCS 01248	94N0186	Control HV	24.7091	0	1	1	2.295	2.90196	1.95521	1.88995	2.22483	-14.99	4.4	3.9619		2.9058	2.09691	2.47857
CNCS 01259	94N0186	Control HV	38.4778	1	1	1	4.39	21.8679	2.4062	2.24057	2.63227	-38	10	0.98		2.49776	1.51983	1.51455	1			0.813327	0.161612
CNCS 01274	94N0186	Control HV	52.1999	1	1	1	1.795	17.805	0.814753	1.65549	1.71403	-26.96	16	10.05		3.64943	3.08565	2.51055
CNCS 01278	94N0186	Control HV	53.2717	0	1	1	2.69	13.2788	1.54673	1.6221	1.88708	-43.99	18.64	6.8741		3.47159	3.09621	2.15229	-6.47228	0.0311957	0.255729	1.55491	0.037694
CNCS 01280	94N0186	Control HV	65.3251	0	0	1	1.995	14.0752	1.93799	1.98902	2.26529	-25.61	3	2.1754
CNCS 01322	94N0186	Control HV	25.9192	0	1	0	2.14	7.75701	1.03156	0.979797	1.30748	-20.1	18	8.6207		3.68899	3.13046	2.75105
CNCS 01332	94N0186	Control HV	44.3901	0	1	1	2.59	9.23938	1.07495	1.39261	1.56323	Square wave	Square wave	Square wave		3.47159	3.09621	2.15229		0.186502
CNCS 01337	94N0186	Control HV	41.8152	0	1	1	No Lab Chart	No Lab Chart
CNCS 01340	94N0186	Control HV	59.5318	0	1	0	5.995	10.7156	2.45232	2.65424	2.86594	-37.18	15.328	5.4526		3.00886	2.46075	2.02531
CNCS 01371	03N0004	Control HV	50.4969	0	1	0	3.99	4.79	1.79727	1.4603	1.96171	-23.95	4.48	1.044		3.64229	3.26649	2.95978				0.863145	0.103362
CNCS 01505	03N0004	Control HV	59.0472	0	1	1	3.49	12.3381	1.91855	1.69731	2.1229	-48	15	5.67		3.16137	2.50515	2.42894	2.75	0.153472		1.83637	0.403132
CNCS 01530	03N0004	Control HV	54.2396	1	1	0	3.52	15.4091	1.87482	1.90964	2.19361	-67	15	2.13		3.25792	2.48714	1.78533	-0.789474	0.649351
CNCS 01549	03N0004	Control HV	44.6899	0	0	0	7.09	4.37236	1.79402	1.84145	2.11942	-24	17.47	9.3946		3.15848	2.25864	2.59151				0.603666	-0.0224348
CNCS 01581	03N0004	Control HV	52.8022	0	1	1	5.39	11.0111	1.93395	2.28173	2.44279	-26	11	7.51		3.51812	3.00604	2.50651	-0.882353	1.22222		1.31139	0.124794
CNCS 01677	03N0004	Control HV	50.7488	1	1	0	2.84	10.8662	1.9222	1.42745	2.0428					3.72419	2.67852	1.81954
CNCS 01999	03N0004	Control HV	65.4209	1	Hin.	0	3.69	7.31707	1.35002	1.6149	1.80338	-24	6.9486	3.03		2.58546	2.23553	1.77815
CNCS 02040	06N0047	Control HV	58.2971	0	0	1	4.89	8.87117	1.78569	2.11845	2.28422	-44	7	4.92		3.70381	3.42586	3.1313	-1.6	0.538462	0.247221
CNCS 02218	06N0047	Control HV	27.0965	1	1	1						-37	6.4	5.82		3.40961	2.97207	2.70464	Undefined	-0.0280892	-0.0753675
CNCS 02243	03N0004	Control HV	40.397	0	1	1	2.89	13.44	1.36173	1.70757	1.86923	-20	19	13.07		3.07262	2.72835	2.54777	-10	-0.0731707	0.270742	0.992989	0.0748237
CNCS 02691		Control HV	70.4613	0	1	0	2.24	13.9107	2.16115	1.43269	2.23556					2.89856	2.18953	2.17802	1.34244	0.346813	0.00522864	0.315217	-0.0217687
CNCS 02840		Control HV	60.0465	1	1	1	4.19	9.40334	1.89676	1.79036	2.14784						Pacer	Pacer	-0.0436524	0.171603	0.439018
CNCS 02897		Control HV	55.4141	1	1	1	2.24	6.875	1.28227	1.16829	1.53004					3.57365	3.31639	2.50199	-1.46549	0.0468588	0.305258	1.0002	0.0365962
CNCS 02900		Control HV	72.4736	1	1	1	1.79	6.00559	0.695767	1.3665	1.45052	-32.2	4	13.15		2.77887	1.82607	1.61278	-649.381	1.85143	0.562142
CNCS 03199		Control HV	60.7611	1	B	1	3.74	19.7166	2.86216	1.88357	2.90555	-89	37	2.669		2.92012	2.65321	2.04689	-0.862704	1.91036	0.197265	0.328743	0.0580172
CNCS 03220	09N0010	Control HV	43.6496	0	B	1	Square wave	Square wave	Square wave	Square wave	Square wave	Square wave	Square wave	Square wave	25.82	2.78305	1.45667	1.95453	10.5239	1.85143	0.562142
CNCS 03464	03N0004	Control HV	52.3778	0		0	3.54	13.0562	2.33672	1.89479	2.47073	-42.12	24.7156	7.9052	59.36	3.59051	2.90304	2.95173	-0.338455	1.68368	0.55772	0.32809	0.130115
CNCS 03583	03N0004	Control HV	58	0	1	0	5.59	2.678	1.16151	1.40739	1.60265	-8.94	4.3018	6.7971	65.9	3.52061	3.20466	2.59439	-0.536687	0.324862	0.124946	0.56854	0.0622705
CNCS 02127	09N0010	Control PDRisk Screen	56.2875	0	1	1	2.59	7.79151	2.04437	0.579648	2.05901	-36.66	14.7708	3.93		3.26834	2.97313	1.93702	-2.77897	0.829253	0.600508	2.625	0.059322
CNCS 02311	09N0010	Control PDRisk Screen	56.5832	0	1	0	1.44	31.7778	2.07752	1.4546	2.17034	-58.18	42.4155	5.1385		3.34361	3.02461	2.70478	2.00327	0.0823092	-0.0720403	0.326154	0.079809
CNCS 02376	09N0010	Control PDRisk Screen	60.4171	0	1	1	2.34	17.6667	1.37776	1.6282	1.82182	-45.69	15.7034	3.6077	20.4	3.52746	3.28634	2.6997	-2.85237	-0.264635	-0.100743	0.318333	0.313178
CNCS 02398	09N0010	Control PDRisk Screen	56.3313	0	1	0	2.24	13.2857	1.52096	1.4458	1.78604	-40.15	9.7388	1.6282		2.92798	2.36538	1.47743	-15.5303	0.552052	-0.0383916	1.04975	0.128859
CNCS 02478	09N0010	Control PDRisk Screen	47.1677	0	1	1	3.24	13.7068	2.0223	1.66311	2.17986	-46.93	29.592	6.3848		4.13408	3.54497	3.67559	2.8605	0.188309	-0.0223415	1.61435	0.124889
CNCS 02520	09N0010	Control PDRisk Screen	57.6756	0	1	0	1.45	12.9931	1.98482	1.0248	2.03	-45.56	7.3148	2.0774		2.64097	2.26571	1.38478	2.17093	-0.5505	5.06271	1.35216	0.176019
CNCS 02526	09N0010	Control PDRisk Screen	56.8186	0	1	0	1.54	22.2532	1.85802	1.29436	1.96289	-54.98	13.3341	1.8376		3.21859	2.82574	2.28256	-4.37059	-0.347725	-0.125499	0.605405	0.194161
CNCS 02545	09N0010	Control PDRisk Screen	36.9309	0	1	0	2.44	12.8402	1.68417	1.64886	1.96791	-59.95	7.9672	3.5905		3.10798	2.30328	2.66227	-0.603071	0.331969	0.497842	1.07981	0.0683031
CNCS 02612	09N0010	Control PDRisk Screen	57.796	0	1	0	3.63	6.87052	1.39958	1.54752	1.78085	-37.97	16.7291	5.3973		3.63843	2.98409	3.39976	-1.16607	0.565657	0.171943	1.15493	0.00449438
CNCS 02627	09N0010	Control PDRisk Screen	52.4326	0	1	1	4.19	3.96659	1.61911	1.61372	1.91745	-26.75	3.7845	2.2536		2.57471	1.82953	2.01814	-0.600187	1.57723	0.149635	4.23865	0.264946
CNCS 02666	09N0010	Control PDRisk Screen	68.293	1	1	0	2.19	13.9132	1.72462	1.64102	1.98586	-40.65	7.3117	2.139		2.75393	2.36221	2.04773	-0.989696	0.497356	0.177254	1.63736	0.0347594
CNCS 02668	09N0010	Control PDRisk Screen	54.538	0	1	0	3.24	11.7654	2.01833	1.76868	2.21223	-41.29	4.4569	0.947		3.31314	2.28214	1.85967	-0.539824	0.665913	0.158088	0.654167	0.136282
CNCS 02846	09N0010	Control PDRisk Screen	68.2847	1	1	0	19.54	2.46571	2.18862	2.31744	2.55882	-54.84	8.2421	1.4621		2.72464	1.73032	1.9824	-0.686049	-0.0915859	0.541705	0.261304	0.0246729
CNCS 02901	09N0010	Control PDRisk Screen	64.5777	1	1	0	3.09	23.4498	2.25525	2.11191	2.4905	-87.25	4.6801	0.8799		3.67187	3.24452	2.29226	1.55648	-0.252035	-0.0757382	0.478127	0.0477636
CNCS 02908	09N0010	Control PDRisk Screen	53.5441	0	1	0	3.14	15.7548	2.10767	1.98567	2.35197	-60.19	8.6687	2.5265		2.94631	2.38375	1.92298	-0.153449	1.23113	1.24386	No data	No data
CNCS 02962	09N0010	Control PDRisk Screen	51.5838	0	1	0	19.54	3.36131	2.0204	2.71502	2.79493	-45.47	4.7	1.112		ectopy	ectopy	ectopy	1.78912	0.736983	0.167612	1.34951	0.070442
CNCS 03028	09N0010	Control PDRisk Screen	62.0178	1	1	0	1.49	16.6711	0.978282	1.05829	1.32115	-24.22	3.824	2.2463		3.03901	2.02639	2.63742	-0.968652	-0.329199	-0.187568	0.0166667	0.126058
CNCS 03071	09N0010	Control PDRisk Screen	45.974	0	1	0	3.34	10.5449	2.14903	1.71899	2.28622	-29.41	13.9679	6.5328		2.3991	1.83864	1.06796	-1.01156	0.0337958	0.403615	1.59195	0.10311
CNCS 03131	09N0010	Control PDRisk Screen	54.538	0	1	0	4.09	8.43521	1.21717	1.842	1.93445	-30.4	8.6121	6.0538		3.68667	3.17027	2.78335	-106.531	0.189185	0.356897	1.34268	0.0432513
CNCS 03176	09N0010	Control PDRisk Screen	47.2608	0	1	0	3.09	19.2751	2.51388	1.55349	2.55902	-32.12	19.908	7.0051		3.71975	3.2878	2.83973	-4.78871	-0.562914	0.234831	0.527211	0.154421
CNCS 03236	09N0010	Control PDRisk Screen	56.4682	0	1	0	3.29	7.76	1.89084	1.53924	2.05072	-40.35	4.92	1.0678		2.57864	2.27875	1.31597	5.5	-0.0645161	0.372355	0.900398	0.037415
CNCS 03257	09N0010	Control PDRisk Screen	52.2546	0	1	0	2.49	12.9237	1.45074	1.25701	1.66562	-65.4	9.469	4.8757		3.56538	3.22011	2.58399	-0.27563	0.640229	0.37931	0.192214	0.0671355
CNCS 03321	09N0010	Control PDRisk Screen	57.7687	0	0	0	6.4	6.4	2.04139	2.26482	2.46835	-56.9	40.9	4.6		2.52244	2.01703	1.62325	-2.25	0.15	0.402445	0.402299	-0.0963734
CNCS 03350	09N0010	Control PDRisk Screen	61.9055	1	1	1	4.09	17.4282	2.15544	1.99421	2.3833	-65.7187	8.04097	2.3308	38.6	3.31133	2.76507	2.45439	-0.257095	1.22185	0.529259	1.73182	-0.0736468
CNCS 03367	09N0010	Control PDRisk Screen	56.3368	0	1	0	11.94	3.26633	1.34518	1.08128	1.534	-61.38	28.5164	3.6285		2.53275	2.18752	1.62325	-0.630124	1.74367	0.259669	0.439361	0.0469766
CNCS 03428	09N0010	Control PDRisk Screen	52.7803	0	1	0	No data	No data	No data	No data	No data	No data	No data	No data	38.63	3.1959	2.91392	2.82138	-0.723449	-0.304138	0.332017	No data	No data
CNCS 03443	09N0010	Control PDRisk Screen	52.5147	0	1	0	2.24	13.8125	1.88155	1.50533	2.034	-17.6	11.3822	7.6		3.40019	2.77452	2.3784	-1.05229	1.82617	0.601741	2.27439	0.267937
CNCS 03501	09N0010	Control PDRisk Screen	55.8439	0	1	0	3.54	9.44	1.89454	1.68205	2.10219	-40.0625	7.35669	2.0769	42.02	3.28058	2.66096	2.25912	1.60709	3.57656	-0.025001	0.741935	0.0211382
CNCS 03540	09N0010	Control PDRisk Screen	59.0335	1	1	0	3.14	10.2209	2.09444	2.04024	2.36922	-59.2812	3.14822	-0.3486	11.32	2.11528	1.51108	1.38934	-0.593034	-0.231526	0.302468	0.680526	-0.0362929
CNCS 00036	none	Control r/o CAF	58.2094	1	1	0	11.49	3.47694	1.93591	2.31465	2.46635	-87.46	10	-0.21		Ectopy	Ectopy	Ectopy				0.638995	0.0704682
CNCS 00078	03N0004	Control r/o CAF	71.0198	1	1	0	2.39	22.1046	1.25459	1.50251	1.69704	-30	9	3.82		2.32833	1.70684	1.56814	-0.388889
CNCS 00166	03N0314	Control r/o CAF	50.1958	0	1	1	1.69	15.4734	1.65413	1.21377	1.78855					3.17909	2.85181	2.4304				1.37238
CNCS 00783	00N0008	Control r/o CAF	61.8015	1	1	0	1.79	59.0279	1.77737	2.01049	2.21042	-67.1	8.7548	0.6363		2.15001	1.34864	1.09587				0.425101	0.0534944
CNCS 00823	00N0008	Control r/o CAF	75.9069	1	1	1	2.69	8.87361	1.5983	1.39971	1.81129	-85.54	6	0.54		2.56075	1.906	2.02195				0.775054	-0.00457292
CNCS 01020	00N0008	Control r/o CAF	61.2457	0	1	0	Unreliable BP	Unreliable BP	Unreliable BP	Unreliable BP	Unreliable BP	Unreliable BP	Unreliable BP	Unreliable BP					0.363636			1.51785	-0.0269608
CNCS 01455	03N0004	Control r/o CAF	57.6783	0	1	1	4.04	11.2871	1.79925	1.84869	2.1257	-55	8	3.54					-0.6	1.45784		0.882605	0.140653
CNCS 01519	03N0004	Control r/o CAF	48.386	0	1	0	2.99	3.32441	1.37272	1.04572	1.54033	-17	3	3.7			5.428	2.43068	0.269231	-0.30303		1.90226	0.175487
CNCS 01532	03N0004	Control r/o CAF	80.4764	1	1	0	8.99	10.8821	2.55306	2.45034	2.80576					3.68422	2.43068	1.69602	0.454545	0.196266		0.501408	0.0523438
CNCS 01689	03N0004	Control r/o CAF	60.6051	1	1	0	6.79	4.15464	1.8339	1.80768	2.12202	-48	11	3.14					3.375	-0.195652		0.610837	0.0823497
CNCS 01715	03N0004	Control r/o CAF	64.6379	1	1	1										2.90493	2.39393	1.89992	0.0204082	-0.676056		1.78317	0.01868
CNCS 01745	03N0004	Control r/o CAF	40.0301	0	1	1	1.99	9.45729	1.4973	1.19616	1.67335	-40	9	1.22		3.74807	3.09078	2.23265	-9.75	0.526316		0.946023	0.123217
CNCS 01803	03N0004	Control r/o CAF	47.7782	0	1	1	2.09	10.1053	1.80197	1.44273	1.95951	-32	4	0.55		2.0569	1.66276	1.50515	-0.580645	1.09091		0.920598	0.542394
CNCS 02024	03N0004	Control r/o CAF	55.4278	0	1	1	Portapress BP	Portapress BP	Portapress BP	Portapress BP	Portapress BP	-71	16.8	1.92		3.34947	2.6981	1.98677	0.740741	0.607143	0.424139	1.16019	0.027027
CNCS 02042	03N0004	Control r/o CAF	67.2252	1	1	0	2.34	16.2393	2.04119	1.51605	2.15461	-48	58	4.88		2.8739	2.48287	2.07918	-0.65	0.244444		0.790139	0.179782
CNCS 02052	03N0004	Control r/o CAF	74.0999	1	1	0	3.89	7.68638	1.86702	1.95683	2.21527	-25	2	0.55						-0.264706	0.00935686
CNCS 02185	03N0004	Control r/o CAF	48.011	0	1	1	0.89	83.7079	2.51927	1.38397	2.54996	-121	8	0.25		Tech. poor ECG	Tech. poor ECG	Tech. poor ECG	0.4375	1.01411	0.0361345	0.580445	0.0885273
CNCS 02370	03N0004	Control r/o CAF	45.8398	0	1	1	9.99	5.45546	2.35175	2.05569	2.5295	-48	5	0.84		2.73719	1.64444	2.06967	1	-0.216216	-0.150208	1.59899	0.0184626
CNCS 02418	03N0004	Control r/o CAF	56.7748	0	1	1	2.19	28.3379	2.56036	1.67815	2.61388	-52	15	3.61		3.70638	3.23147	2.34635	1.4	-0.2	-0.070344	0.227178	-0.0107817
CNCS 02422	03N0004	Control r/o CAF	36.6324	0	1	1	Square wave	Square wave	Square wave	Square wave	Square wave	-35	12	3.92					-3	-0.0204082	0.239227
CNCS 02448	03N0004	Control r/o CAF	52.4627	0	1	1	3.59	15.4262	2.09504	1.75244	2.25771	-49	Pacer	-0.05		Pacer	Pacer	Pacer	0	1.52174	0.188514
CNCS 02465	03N0004	Control r/o CAF	67.1239	1	H	0	2.74	29.708	2.03903	1.86571	2.26199	-57	12	1.25						-0.056338	0.127346	0.745186	0.0378355
CNCS 02466	03N0004	Control r/o CAF	60.0548	0	1	0	3.79	6.26649	2.27525	0.800687	2.28958	-43	6	0.91		3.86717	3.49052	3.2383	3.55556	-0.298246	0.791337	0.0856757	-0.0680022
CNCS 02474	03N0004	Control r/o CAF	39.4415	0	1	0	1.49	11.3087	1.9478	0.77431	1.97599	-43.53	11.9	3.99		2.88986	2.74896	1.97772	1	-0.709677	0.329489	0.607304	-0.000837165
CNCS 02532	03N0004	Control r/o CAF	59.2991	0	1	1	3.49	13	2.38202	1.81954	2.48714	-49	15	5.24		3.50605	2.78246	2.41259	-3	-0.5	-0.00483595	0.593074	0.159574
CNCS 02592	03N0004	Control r/o CAF	57.128	0	1	0	3.19	10.953	1.8084	1.51303	1.98638	-46	6	1.59					5.66667	0.387097	0.0976073	0.731293	0.025266
CNCS 02693	03N0004	Control r/o CAF	64.1451	1	1	1	5.79	6.55268	2.44396	1.60652	2.50292	-50.19	6.79	1.58		2.9858	2.25011	2.48364	-0.25	1.3125	0.0977403	0.765579	0.0889292
CNCS 02780	03N0004	Control r/o CAF	52.282	0	1	0	4.3	8.2	2.25933	1.70303	2.36549	-33	21	1.7		2.17898	1.85126	1.07918	-2.58364	0.262711	0.247671	0.421329	0.0449567
CNCS 02851	03N0004	Control r/o CAF	49.4648	0	1	0	6.89	8.11321	2.21377	2.23119	2.52359	-48.75	12.6	1.8891					0.994218	1.22811	0.0862721	1.70492	-0.0107108
CNCS 02973	03N0004	Control r/o CAF	51.5948	0	1	0	2.49	17.1968	1.97887	1.71527	2.1678	-34.71	5.2	2.26	40.7	3.30211	2.5649	2.39724	2.81118	0.188236	0.208974	-0.0297924	0.0384557
CNCS 03001	03N0004	Control r/o CAF	58.6721	0	1	1	2.79	16.0968	2.11304	1.80018	2.28522	-37.87	8.2	3.56		2.96187	2.65801	2.4014	1.90236	0.59674	2.19448	1.36074	0.112862
CNCS 03003	03N0004	Control r/o CAF	75.5838	1	1	1	17.34	2.99481	2.4607	2.38711	2.72649	-59.53	15.7107	1.4908		2.81358	1.7356	1.21219	-1.55449	7.33904	0.251722	0.553846	-0.0806643
CNCS 03005	03N0004	Control r/o CAF	83.1129	1	1	0	Ectopy	Ectopy	Ectopy	Ectopy	Ectopy	-72.1	18.9408	1.9293					-1.3677	1.60402	0.882212	0.740243	0.0415312
CNCS 03029	03N0004	Control r/o CAF	54.5243	0	1	0	5.79	1.90501	1.0497	1.57781	1.69055	-20.04	14.6554	11.11		3.28735	2.78604	2.60314	1.09216	-0.347145	0.990292	0.819865	0.0328266
CNCS 03050	03N0004	Control r/o CAF	63.6687	1	1	0	2.09	13.067	2.02157	1.52932	2.14278	-39.75	6.85	0.32		1.86332	1.17609	1.38627	-0.48995	1.36391	0.199525	0.780916	0.0980342
CNCS 03163	03N0004	Control r/o CAF	62.089	0	1	1	5.14	7.42	1.93263	1.72082	2.14057	-32.29	12.405	5.13	22.156	2.49817	1.71767	1.07918	-0.367732	0.584748	0.653942	1.58291	0.0643263
CNCS 03191	03N0004	Control r/o CAF	59.8303	0	1	1	6.39	6.26	2.23053	1.9628	2.418	-71.16	20.6136	3.38					-2.8439	0.334349	0.4917	1.20763	-0.0839158
CNCS 03224	03N0004	Control r/o CAF	87.1294	1	1	1	16.44	3.02616	2.23655	2.42804	2.6438	-42.4	4	1.5666		3.35854	2.2661	3.10884	0.182801	4.74535	0.0372967	0.335211	-0.100635
CNCS 03249	03N0004	Control r/o CAF	59.2015	0	1	1	8.49	6.18	2.34147	2.09889	2.53793	-51.19	19.4027	4.33	25.974	2.45939	1.45423	1.34577	-1.5308	0.578293	0.34163	2.38077	0.117739
CNCS 03252	03N0004	Control r/o CAF	30.0452	0	1	1	1.74	15	1.99564	1.14613	2.05308	-49.2	24.9	2.08		3.10209	2.4843	2.07918	-1.0625	-0.103448	0.25135	1.60121	0.318947
CNCS 03300	03N0004	Control r/o CAF	49.3607	0	1	1	4.94	3.63765	1.89242	1.33031	1.99762	-32.5	13.868	3.64		2.80956	2.51188	2.29667	-0.870717	0.188834	0.248327	0.616101	0.0474094
CNCS 03316	03N0004	Control r/o CAF	61.6386	1	1	0	1.59	16.4277	1.8584	1.19822	1.94429	-34.66	4.0727	-0.66	7.1	2.33244	1.77085	1.32222	2.68189	0.490847	0.164099	0.84127	0.0746753
CNCS 03398	03N0004	Control r/o CAF	65.6838	0	1	0	3.19	19.1034	1.97016	1.96328	2.26777	Paced	Paced	Paced					0.145981	BIZARRE	0.673026	No sample	No sample
CNCS 03521	03N0004	Control r/o CAF	74.2601	1	1	0	25.54	1.58457	2.28735	1.8479	2.42202	-29.81	23.4455	3.0965	50	3.04415	2.46538	1.20412	0.355855	1.00848	-0.0272711	0.496198	-0.0104975
CNCS 03531	03N0004	Control r/o CAF	77.8344	1	1	1	8.49	5.71967	2.25713	2.2851	2.57237	-67.75	3.6044	1.75	42.1	2.95424	2.30103	2.04922	-0.30524	0.593648	0.26949	0.328125	-0.00968992
CNCS 03753	14N0122	Control r/o CAF	16.909	0	1	0	7.19	1.6815	1.59248	1.8338	2.03072	-24.21	7.8132	5.922	46.4	3.36866	2.6637	2.7007	-3.75538	-0.311554	0.0278667	1.16176	0.29582
CNCS 03777	18N0140	Control r/o CAF	61.6099	1	0	0	2.39	9.83264	2.02155	1.43548	2.12171	-48.69	13.0962	1.3888	42.757	2.97772	2.35793	1.1271	-0.480616	0.45266	0.247743	0.927711	0.183673
CNCS 03872	18N0140	Control r/o CAF	40.4326	0	1	1	1.59	15.6667	1.75397	1.17182	1.85494	-30.6	13.3	6.73	74.7	3.48058	2.76118	2.87679	-0.25	-0.206522	0.412326	0.623932	0.00418848
CNCS 03894	18N0140	Control r/o CAF	74.9076	1	1	1	12.64	8.4286	2.82416	2.80736	3.11687	-90.6594	26.1033	2.5415	10.6	2.20412	1.57978	1.49136	-0.718511	0.773864	1.63282	1.70976	0.0986
CNCS 03901	18N0140	Control r/o CAF	57.3388	0	1	1	4.29	22.6209	2.67777	2.38497	2.85662	-88.7094	5.9066	0.884	62.36	3.46761	2.35813	1.76485	-2.07615	0.948869	0.72466	0.492103	-0.00069697
CNCS 03909	18N0140	Control r/o CAF	69.373	1	1	1	8.94	8.24629	2.29817	2.26699	2.58389	-62.5281	5.20343	1.3784	46.46	3.3294	2.64493	2.39898	-0.477515	0.801308	1.37091	0.255261	-0.00817049
CNCS 03910	18N0140	Control r/o CAF	41.7988	0	1	0	3.39	11.9082	1.84594	2.1746	2.34168	-27.07	10.103	6.312	34.24	2.69671	2.52035	2.03663	-28.9531	0.663282	1.27684	1.90347	0.157
CNCS 03915	18N0140	Control r/o CAF	65.9548	1	1	0	8.84	0	2.8208	2.8208	3.12183	-64.875	56	3.746	57.6	2.94537	2.54419	2.34183	32.9733	-0.259011	0.267951	0.27638	0.13782
CNCS 03920	18N0140	Control r/o CAF	68.9446	1	Asian	1	Square wave	Square wave	Square wave	Square wave	Square wave	Square wave	Square wave	Square wave	41.74	3.48073	3.15806	2.92675	-0.475945	-0.15564	0.724128	-0.199898	-0.104375
CNCS 03921	18N0140	Control r/o CAF	62.0917	1	1	0	20.64	3.91155	2.40525	2.60913	2.82008	-62.138	7.1941	0.4475	22.54	2.5924	1.26764	2.52061	-0.399926	0.907271	0.332584	1.03009	0.108008
CNCS 03931	18N0140	Control r/o CAF	57.1855	0	1	0	5.39	5.59032	2.42436	1.97277	2.55582	-29.383	4.5916	2.0557	72.97	3.6149	2.2584	1.63458	-0.603282	0.368603	1.13087	0.417286	-0.0451115
CNCS 03940	18N0140	Control r/o CAF	61.5962	1	1	0	3.99	10.9183	1.86356	1.86954	2.16759	-36.398	5.9633	2.0061	20.15	2.81974	2.31618	1.68592	-0.247679	0.433901	0.574166	1.71176	-0.00204354
CNCS 00042	03N0004	PAF	72.9708	1	1	1	15.39	4.87394	2.50866	2.55112	2.83144	-58	10	0.89	24.3	1.43933	0.176091	0.808211	0.0377358	-0.528939	-0.177422	0.0595054	0.00337868
CNCS 00241	03N0004	PAF	60.627	0	1	1	12.19	2.84578	2.33137	2.3806	2.65771	-29	7	2.93		3.05689	2.37667	1.88874	0.304348	0.353846	0.0505707	-0.252532	-0.078176
CNCS 00656	94N0186	PAF	40.9199	0	1	1	7.34	7.66	2.26245	2.79727	2.90849	-63.5	4	0.65		3.18355	2.47567	2.2878
CNCS 00674	94N0186	PAF	30.1739	0	1	0	10.495	7.60076	2.89173	2.49244	3.03747	-99	28	1.4437		2.98989	2.49346	2.20058	0.851064			0.73913
CNCS 00688	94N0186	PAF	45.2868	0	1	1	18.64	3.6	2.63548	2.81823	3.03743	-89.35	40	4.4241		3.36791	3.14019	2.4183	2.23077			0.314607
CNCS 00693	94N0186	PAF	51.8385	0	1	0	18.09	4.11774	2.27126	2.68744	2.82843	-46	7	1.05		2.7574	1.94939	1.70757	0.12963			-0.107143	-0.0894855
CNCS 00728	94N0186	PAF	65.7221	1	1	1	15.695	5.48837	2.90738	3.03675	3.27789	-102.45	7	0.9353		2.65321	2.17026	1.85733	0.112903			0.222222
CNCS 00757	94N0186	PAF	76.6324	1	0	0	7.29	10	2.86332	2.35218	2.97955	-93	8	0.89		3.21085	2.233	1.69897	0.131148			0.506836	0.0559317
CNCS 01096	03N0004	PAF	60.6781	0	1	0	32.79	2.81915	2.1517	2.80882	2.89526	-82	2	0.05		1.29003	0.190332	0.961421	0.0777778	1.22222	-0.322414	-0.028726	0.0389793
CNCS 01411	03N0004	PAF	65.7696	1	1	1	20.69	3.61044	2.34376	2.62042	2.80479	-52	9	2.52		3.14613	2.50474	2.35295	0.132075	-0.287879	0.356745	0.18797	0.0491803
CNCS 01500	03N0004	PAF	65.0404	1	1	1	33.19	1.80777	2.28434	2.68758	2.8322	-78	4	0.15		1.43136	0.30103	0.60206	-0.027027	-0.493423		-0.612289	-0.0390412
CNCS 01702	03N0004	PAF	73.7259	1	1	1	11.99	4.1568	2.36291	2.464	2.71742	-61	4	2	25	2.58433	1.95424	1.8451	0.205128	0.0847458	-0.269813	0.240361	-0.163361
CNCS 01806	03N0004	PAF	73.5003	1	1	0	16.59	4.14768	2.43279	2.51835	2.7787	-55	10	2.85		3.98976	2.53908	1.87506	0.40625	-0.424658		0.44089	0.157238
CNCS 02006	03N0004	PAF	83.0637	1	1	1	16.49	6.00364	2.50749	2.61035	2.86299	-115	5	0.42		2.17609	0.954243	0.60206	0.146341	-0.26322		0.0376176	0.045977
CNCS 02289	03N0004	PAF	84.2847	1	1	1	15.09	5.03	2.44634	2.60638	2.83506	-74	4	-0.03		2.8488	2.1271	2.54654	-0.105263	-0.525	-0.391533	-0.0135747	-0.031768
CNCS 02353	03N0004	PAF	74.0514	1	1	0	13.24	8.25453	2.75052	2.61736	2.99005	-103	10	1.27	71.48	3.10958	2.32838	2.69548	0.248301	-0.378546	-0.412139	0.570997	0.0523821
CNCS 02587	03N0004	PAF	65.2594	1	1	1	4.8	13.69	2.19866	2.12548	2.46389	-36	3	0.39		1.93301	0.522966	0.882354	0.188745	0.0642056	0.306149	0.247512	-7.3409e-06
CNCS 02790	03N0004	PAF	77.4921	1	1	0	33	1.75	2.4216	2.86747	3.00043	-80.4	19.893	0.29		Ectopy	Ectopics	Ectopics	0.233709	-0.716385	-0.230822	0.234525	-0.13258
CNCS 02966	03N0004	PAF	79.5099	1	1	1	15.69	4.32186	2.15993	2.64963	2.77146	-50.68	Paced	Paced		Pacer	Pacer	Pacer	0.0520945	-0.0866688	-0.14276	-0.00121903	-0.133184
CNCS 03063	03N0004	PAF	44.6927	0	1	1	25.59	4.13482	2.43693	2.63187	2.84628	-91.28	9.0858	0.3638		Ectopy	Ectopy	Ectopy	0.222884	0.121121	-0.207813	0.0736842	0.0102041
CNCS 03101	03N0004	PAF	75.05	1	B	1	5.89	18.9355	2.3232	2.38103	2.65411	-90.59	3.2417	0.7079		3.63114	2.49969	3.37365	0.160508	0.363203	-0.135808	0.171812	-0.00284776
CNCS 03212	03N0004	PAF	60.086	0	1	0	20.59	3.06119	2.49008	2.95007	3.07935	-64.94	7.0542	1.7645	36.742	2.56769	2.07188	1.6835	0.369024	-0.967758	-0.28213	-0.126126	-0.0972851
CNCS 03533	03N0004	PAF	67.7787	1	1	1	31.89	2.11853	2.45255	2.60474	2.83631	-78.41	10.3	2.47	67.82	3.53377	2.97681	2.65418	0.378479	-0.237216	-0.139103	0.0978261	0.0529101
CNCS 03682	03N0004	PAF	55.4251	0	1	1	8.74	9.77231	2.67957	2.58683	2.9367	-112.65	43.8038	2.867	58.09	3.18949	2.83123	2.52244	0.30258	-0.347132	-0.372197	0.547619	-0.0516556
CNCS 03698	18N0140	PAF	66.412	1	1	0	22.94	2.45	2.03334	2.86317	2.9231	-82.4656	8.83505	0.0016	Artifact (tremor)	Artifact (tremor)	Artifact (tremor)	Artifact (tremor)	0.0537137	-0.208313	-0.0884923	0	0.0680851
CNCS 03712	03N0004	PAF	79.9343	1	1	1	Square wave	Square wave	Square wave	Square wave	Square wave	Square wave	Square wave	Square wave	Ectopy	Ectopy	Ectopy	Ectopy	0.241999	0.760104	0.0848027	0.229358	-0.0355221
CNCS 03750	03N0004	PAF	69.1225	1	1	1	9.09	7.63	2.27875	2.28556	2.5832	-65.7	6.7	1.2907	19.274	2.58685	2.17957	1.23373	-0.450035	0.331781	0.746649	0.745101	-0.0140682
CNCS 03751	03N0004	PAF	60.3614	1	1	1	21.19	6.76923	2.72528	3.125	3.27062	-116.12	0.85	0.092	56.294	3.27091	1.23399	1.20412	0.21651	-0.783143	-0.390163	0.275846	-0.0100581
CNCS 03765	03N0004	PAF	72.177	1	1	1	13.89	7	2.46556	2.82265	2.98085	-106	4.17	0.359	54.286	2.77934	1.52969	2.66612	0.0167949	-0.282748	-0.373198	0.056338	-0.00471698
CNCS 03789	18N0140	PAF	60.8214	1	1	0								1.989					0.701304	-0.473023	0.133292	0.23913	0.216763
CNCS 03816	18N0140	PAF	70.527	1	1	1	7.29	6.262	1.79802	2.17016	2.32382	-56	5.6	1.2902	48.255	3.21537	2.59522	2.60787	0.194157	0.00994125	0.197926	0.123231	-0.152731
CNCS 03844	18N0140	PAF	75.2635	1	1	1	20.94	5.48472	2.69262	2.99117	3.16809	-82.06	1.9992	-0.184	8.2	1.54407	0.477121	0.90309	-0.00232239	-0.746223	0.111391	0.234694	0.14377
CNCS 03871	18N0140	PAF	77.3963	1	1	1	39.39	0.835999	1.83037	2.84851	2.88828	-54.2	1.1	0.06	14	1.74819	0.954243	1.07918	0.0706485	-0.782503	0.437265	0.0643809	0.0363139
CNCS 03875	18N0140	PAF	83.8494	1	1	1	20.89	4.09586	2.74096	2.91004	3.13471	-110.781	5.28794	0.4023	28.25	2.79775	1.75358	2.51375	0.669738	-0.751609	0.0164364	0.768459	0.173376
CNCS 03886	18N0140	PAF	71.6131	1	1	0	11.94	7.19561	2.5917	2.4841	2.84225	-97.2125	7.54456	0.5005	6.576	1.42943	1.08063	0.83353	0.241602	1.63506	0.559547	0.25596	-0.0531796
CNCS 03892	18N0140	PAF	72.5476	1	1	1	15.14	3.32	2.10826	2.56615	2.69598	-23.825	4.667	0.6822	50.8	1.85187	1.09272	1.60541	0.288621	0.932206	0.153086	0.0172112	-0.122168
CNCS 03918	18N0140	PAF	72.6968	1	1	1	8.79	0	2.42382	2.42382	2.72485	-43.763	10.814	1.1402	16.76	2.50745	1.91876	1.59671	3.06115	-0.13731	0.425524	0.655821	-0.155911
CNCS 03926	18N0140	PAF	69.5359	1	1	0	21.39	3.56621	2.65746	2.40582	2.85064	-52.0687	14.4416	2.1018	16.42	2.59693	2.3731	1.45682	4.54627	1.71788	1.45849	0.620616	0.12368
CNCS 00001	03N0004	PD+OH	78.8392	1	1	0	6.89	8.01016	2.0899	2.52276	2.6592	-40	6	1.23					0.125	-0.117647		2.17857	0.00202737
CNCS 00119	03N0004	PD+OH	62.0726	1	1	1	Ectopy	Ectopy	Ectopy	Ectopy	Ectopy	-67	47	Couldn't calc.					0.6	-0.319149		1.03141	0.0215873
CNCS 00155	94N0186	PD+OH	71.3238	1	0	1	4.69	28.774	2.90928	2.75266	3.13903	-142	10	0.4873					0.315789			0.308543	-0.0499328
CNCS 00180	94N0186	PD+OH	62.3901	1	1	1	11.29	3.55093	2.07268	2.08615	2.3805	-53	11	3.13		3.00775	2.72346	2.2014	0.452381			0.0901639	-0.0376471
CNCS 00354	03N0004	PD+OH	78.5462	1	1	0	7.79	9.84596	2.47557	2.50857	2.79342	-75	0	No data:pacer		3.22781	2.14613	2.44248	0	-0.623188		0.661449	-0.0658759
CNCS 00396	03N0004	PD+OH	77.7577	1	0	0	5.09	18.0609	2.44418	2.22457	2.64914	-143	14	0.82		2.81621	1.81491	2.28024	0.209302	0.115385		0.258621	0.165809
CNCS 00541	94N0186	PD+OH	64.6188	1	1	0	7.295	10.7608	2.78965	3.23593	3.36879	-50	12	1.1		2.87679	2.25527	1.69897
CNCS 00585	03N0004	PD+OH	66.8227	1	1	1	4.59	10.2941	2.20849	2.11141	2.46368	-50	13	0.8					0.166667	0.0152224		1.07213	-0.0132353
CNCS 00624	94N0186	PD+OH	68.6489	1	1	1	No Chart record	No Chart record	No Chart record	No Chart record	No Chart record	Hard copy only	Hard copy only	Hard copy only								-0.125
CNCS 00636	94N0186	PD+OH	62.7406	1	1	1	3.94	4.38832	2.02308	1.62443	2.16901	-45	0	0.194		2.50583	1.65321	2.35603	0.232143			0.221429	-0.0359502
CNCS 00637	94N0186	PD+OH	82.1027	1	1	0	9.94	8.28169	2.43697	2.12499	2.60944	-72	9	1.3		2.13033	0.97322	1.68313	0.0789474			0.181713	0.0313041
CNCS 00658	94N0186	PD+OH	77.3949	1	1	0	10.995	7.00318	2.90639	3.23012	3.39877	-116	4	0.15		2.07188	1.04139	1.04139	0.5			0.0182134	-0.0405628
CNCS 00660	94N0186	PD+OH	80.4764	1	1	1	3.495	11.2618	2.75287	2.49498	2.94382	-61	4	0.11		2.1875	1.59106	1.50515	0
CNCS 00664	94N0186	PD+OH	70.7844	1	1	1	11.395	5.90873	2.90535	2.83348	3.17193	-79	15	1.61		3.33017	2.43297	2.25285	0.603774			0.708901	2.21481
CNCS 00665	03N0004	PD+OH	63.8467	1	1	0	11.29	6.81577	2.61765	2.64531	2.93273	-79	11	1.2265		2.4609	1.39794	2.36922	0.703704	No data		0.817239	-0.0248054
CNCS 00667	94N0186	PD+OH	69.1636	1	1	0	12.69	3.94405	2.29327	2.2764	2.58594	-66	11	-0.263		2.46389	1.49136	1.73239	0.275			0.160011	-0.272723
CNCS 00671	94N0186	PD+OH	61.2799	0	1	1	8.895	0.034851	2.9248	2.92778	3.22732	-103.74	3.567	0.4559		2.55267	1.79934	1.57978	0.153846	-0.5	0.167418	-0.051856	-0.0705955
CNCS 00690	94N0186	PD+OH	65.4675	1	1	1	14.795	4.2582	2.78075	2.73829	3.06107	-65	5	0.55					0.0119048			0.13036	-0.0952596
CNCS 00697	94N0186	PD+OH	78.0862	1	1	0	20.745	6.12581	2.83463	3.10643	3.29248	-73	7	0.72		2.7796	2.08279	2.56585	0.101124			0.0365841	-0.165643
CNCS 00720	94N0186	PD+OH	71.2827	1	1	1	Np BP record	Np BP record	Np BP record	Np BP record	Np BP record	Hard copy only	Hard copy only	1.33					0.176471			0.257511
CNCS 00721	94N0186	PD+OH	66.3901	1	1	1	14.195	7.21592	2.83008	3.01684	3.23446	-143	14	1.26		3.3368	2.88649	2.53212	0.12766			-0.248443	-0.030644
CNCS 00722	94N0186	PD+OH	47.1376	0	1	0	27.59	0.37876	1.6278	2.21233	2.3128	-58	19	0.37		3.83033	3.197	3.36736	1.3125			0.959068	0.0802372
CNCS 00725	94N0186	PD+OH	47.7454	0	1	1	7.79	7.95892	2.54844	2.86231	3.03416	-95	21	1.61					0.363636			0.492527	0.11025
CNCS 00734	94N0186	PD+OH	79.9973	1	1	1	7.29	10.6763	2.00141	2.22749	2.43003	-150	30	0.3					0.5	-0.264151		0.778689	-0.0127389
CNCS 00737	94N0186	PD+OH	77.9179	1	1	1	7.245	2.42236	2.15114	2.34915	2.56237	-26	2	0.45		1.47129	1.04454	0.778151	0.243243	0.142857		0.248826	-0.0292505
CNCS 00739	94N0186	PD+OH	69.5975	1	1	1	14.095	2.6364	2.47506	2.66482	2.88125	-29	6.9359	4.5082		3.03342	2.17898	2.69897	0.22449			0.429063	-0.26226
CNCS 00743	94N0186	PD+OH	73.6181	1	1	1	6.395	7.54652	2.434	2.59022	2.82012	-123	14	0.5					0.333333			0.101678	-0.28386
CNCS 00746	94N0186	PD+OH	69.9165	1	1	1	25.04	3.20288	2.84216	3.83612	3.87806	-106	13	0.8		2.4764	1.6721	0.819544	0.130952			0.346148	-0.19084
CNCS 00748	94N0186	PD+OH	55.2717	0	0	1	5.89	4.32088	2.35632	1.669	2.43747	-80	10	0.208		2.99913	1.99123	2.4216	0.529412			0.62963	-0.0824891
CNCS 00760	94N0186	PD+OH	60.5489	0	1	0	20.495	1.12222	2.74031	2.79855	3.07144	-38	3	0.16		2.33244	1.95904	1.57978	No data			0.598515	-0.102664
CNCS 01559	03N0004	PD+OH	73.9781	1	1	1	22.99	1.73124	2.19692	2.66715	2.79382	-86.5	11	2.26		3.1685	2.74429	1.81954	0.102967	-0.27951		0.140802	0.147923
CNCS 01606	03N0004	PD+OH	73.7495	1	1	0	9.29	5.86329	2.18515	2.10696	2.44885	-146	4	0.28		1.63347	1.12872	0.720159	0.0847458	-0.162162	-0.419145	0.222192	-0.0221648
CNCS 01686	03N0004	PD+OH	59.8604	0	1	1	6.79	10.1487	2.24977	2.42501	2.6472	-88	7	0.57		1.91908	0.60206	1.77085	0.117647	-0.205882		0.176116	-0.120532
CNCS 01701	03N0004	PD+OH	59.9206	0	1	1	Afib	Afib	Afib	Afib	Afib	-69	9	2.47		3.22943	2.37291	1.74819	0.109091	-0.428571	0.130091	0.512249	-0.0165377
CNCS 02013	03N0004	PD+OH	68.0712	1	1	1	7.99	10.9011	2.45616	2.87248	3.01344	-100	4	0.03		2.80277	2.2833	2.34044	1.52201	0.124149		0.163987	-0.0142857
CNCS 02063	03N0004	PD+OH	61.5825	1	1	1	10.89	6.89256	2.76025	2.35823	2.90522	-83	9	1.32		2.65321	1.95904	2.07918	0.149286	-0.204431	-0.176619	1.1083	-0.050615
CNCS 02068	03N0004	PD+OH	75.6112	1	1	1	Square wave+Atr. Bigem.	Square wave+Atr. Bigem.	Square wave+Atr. Bigem.	Square wave+Atr. Bigem.	Square wave+Atr. Bigem.	-28	5	1.83					0.0465116	2.53846	-0.349155	0.0196593	-0.211331
CNCS 02140	03N0004	PD+OH	62.6229	1	1	1	27.59	3.53389	2.50178	2.46599	2.78529	-93	15	1.62		2.12385	1.68124	1.11394	0.41791	-0.660108	-0.180685	-0.0715501	-0.191403
CNCS 02143	94N0186	PD+OH	71.4168	1	1	1	7.195	20.0139	2.80627	3.01762	3.2257	-49	6	0.6429		1.81757	0.488551	1.17609	0.428571
CNCS 02178	03N0004	PD+OH	75.2663	1	1	1	15.84	5.84596	2.38873	2.72324	2.88845	-75	1	Pacer					0.310345	-0.127148	-0.223779	0.159259	0.150735
CNCS 02417	03N0004	PD+OH	73.9466	1	1	1	21.49	3.62494	2.35587	2.8305	2.95607	-74	2	0.28		1.53148	0.70757	0.369216	0.025	-0.0952381	0.0597849	0.138419	-0.0420366
CNCS 02458	03N0004	PD+OH	74.0726	1	1	1	Square wave	Square wave	Square wave	Square wave	Square wave	-44	12	0.55			Afib, Pacer	Afib, Pacer	Afib/Pacer	Afib/Pacer	Afib/Pacer	0.135868	-0.0810408
CNCS 02483	03N0004	PD+OH	66.2519	1	1	1	5.79	9.26598	2.64317	2.08081	2.74832	-68	9	1.13		2.18184	1.5563	1.94448	1	0.0163934	0.19909	4.01316	0.0656827
CNCS 02702	03N0004	PD+OH	78.0205	1	1	0	26.29	5.47851	2.6764	3.05424	3.20621	-97	5	0.37		2.34242	1.37535	1.54415	0.284091	0.338235	-0.534827	-0.0883506	-0.125379
CNCS 02964	03N0004	PD+OH	72.6968	1	1	1	6.64	10.9819	2.50178	2.10098	2.74832	-74	13	1.63	14.795	3.01775	2.52592	1.91873	0.351905	-0.120526	-0.342971	0.324452	0.0333731
CNCS 03184	03N0004	PD+OH	67.781	1	1	1	15	3	2.29447	2.48144	2.69897	-82.1	11.6	1.03		2.75511	2.15534	2.28103	0.239045	1.18732	-0.0515181	1.2377	0.0421456
CNCS 03194	03N0004	PD+OH	70.1342	1	1	0	21.39	5.19495	2.79019	2.74247	3.06802	-110.84	12.0056	0.349	Ectopy	3.10653	2.67715	2.26857	0.631788	-0.409068	0.498622	1.26303	0.135648
CNCS 03334	03N0004	PD+OH	70.3307	1	1	0	3.54	25.79	2.24304	2.17609	2.51188	-60.19	13.4	1.749	30.6	2.87448	2.23805	2.09342	0.907238	0.463572	0.581378	1.13408	0.144554
CNCS 03502	03N0004	PD+OH	78.2908	1	I	1	14.74	4.72795	2.07345	2.63341	2.73907	Bizarre	Bizarre	Bizarre	22.937	2.55388	1.81954	2.04922	-0.295904	0.0661781	-0.217305	0.0383142	-0.130564
CNCS 03506	03N0004	PD+OH	67.8248	1	1	1	21.19	2.75507	2.01806	2.53226	2.64822	-65.9	6.5694	1.3282		2.45637	1.80072	1.9722	0.2284	-0.0855468	0.134366	-0.109264	-0.12629
CNCS 03550	03N0004	PD+OH	70.0452	1	1	1	42.69	1.71445	2.66932	2.75614	3.01592	-78.38	18.5171	2.36					0.311386	-0.378835	0.201839	0.00120627	-0.0743134
CNCS 03681	03N0004	PD+OH	75.1595	1	1	0	10.49	3.44328	2.31209	2.40254	2.6607	-48.87	3.19	1.09	29.212	2.72574	2.19052	1.63094	0.686628	-0.571178	-0.292581	0.611207	0.0852908
CNCS 03762	03N0004	PD+OH	70.7817	1	1	1	10.59	12.3088	2.67931	2.84294	3.06982	-145	2	0.0834	10.856	1.53391	1.05994	0.556303	-0.0394513	-0.429241	0.250323	0.457627	0.00813008
CNCS 03821	18N0140	PD+OH	76.5394	1	1	1	12.89	4.70287	2.16353	2.3979	2.59736	Atrial bigeminy	Atrial bigeminy	Atrial bigeminy	Atrial bigeminy	Atrial bigeminy	Atrial bigeminy	Atrial bigeminy	0.07058	-0.893142	-0.321724	0.234476	0.201675
CNCS 03881	18N0140	PD+OH	73.6099	1	1	0	10.99	6.03134	2.51561	2.3876	2.75733	-59.3781	11.2171	0.8088	Atrial bigeminy	Atrial bigeminy	Atrial bigeminy	Atrial bigeminy	0.451524	No data	0.987709	0.354422	-0.0413873
CNCS 03895	18N0140	PD+OH	68.9021	1	1	1	8.84	10.2026	2.63052	2.42904	2.84239	-90.7125	17.561	2.7816	41.45	3.18837	2.90741	2.22272	0.561384	-0.460213	0.591152	1.42683	0.318337
CNCS 03896	18N0140	PD+OH	84.8077	1	1	1	21.19	2.64128	2.38169	2.64963	2.83704	-50.1719	4.39947	0.7366	9.2	1.92428	1	1.20412	-0.128697	-0.731623	1.28918	0.366891	-0.0268065
CNCS 03908	18N0140	PD+OH	70.293	1	1	1	Square wave	Square wave	Square wave	Square wave	Square wave	Square wave	Square wave	Square wave	PACs	PACs	PACs	PACs	0.0924842	-0.35967	0.572514	0.142414	0.00595006
CNCS 03911	18N0140	PD+OH	73.473	1	1	1	6.09	9.75164	2.1759	2.26241	2.52234	-90.35	34.633	1.0693	56.27	3.57553	3.17114	3.04883	-0.25473	-0.0714419	4.3155	0.194034	-0.0775552
CNCS 03916	18N0140	PD+OH	73.6591	1	1	1	10.99	0	2.98393	2.98393	3.28496	-130.972	2.98347	0.5818	11.93	1.8038	1.08814	1.5563	Not done	Not done	Not done	-0.00518135	-0.0811199
CNCS 03919	18N0140	PD+OH	75.2539	1	1	1	15.59	0	2.63287	2.7973	2.99122	-65.181	2.872	0.7318	23.11	2.7364	1.96223	2.07408	0.107895	-0.817261	0.628584	0.188874	0.12936
CNCS 03927	18N0140	PD+OH	67.2882	1	1	1	21.49	1.32223	1.83732	2.32935	2.45061	-20.543	4.523	2.5567	29.73	2.78789	2.37876	1.54531	-0.883924	1.33867	2.21468	0.530748	0.108937
CNCS 03937	18N0140	PD+OH	66.8446	1	1	0	7.19	6.65876	2.3187	2.19073	2.56044	-28.184	3.5946	1.722	20.8	2.17435	1.72419	1.1532	-0.230004	0.221139	1.90705	0.625631	0.147151
CNCS 00040	03N0004	PD No OH	62.5743	1	1	1	5.69	7.08436	2.0133	1.76082	2.20618	-28	42	8.8		3.44185	2.82607	2.32428	-1.5	1.44068	0.245189	0.45135	-0.00800461
CNCS 00047	03N0004	PD No OH	58.2149	0	1	1	8.64	8.73148	2.50396	2.55881	2.83328	-85	34	4.6					-1.36364	0.259259		0.141531	-0.132417
CNCS 00114	94N0186	PD No OH	55.8877	0	1	1	2.84	4.59155	1.66483	1.39345	1.85103	-16	6	12.26		3.12057	2.5435	2.70358	5			0.939685	-0.0143198
CNCS 00130	94N0186	PD No OH	70.4695	1	1	1	5.895	10.7193	2.85824	2.97018	3.21884	-70	12	5.58		3.25864	2.77525	2.46982	-0.533333			1.1545	0.0362423
CNCS 00236	03N0004	PD No OH	57.7331	0	1	0	2.69	8.84015	1.4898	1.36037	1.73092	-40	19	3.6		2.90956	2.53275	2.06446	0.7	0.318182		1.09434	0.11525
CNCS 00446	03N0007	PD No OH	56.4134	0	1	1	2.795	18.4258	2.3838	2.43221	2.70971	-94	26	0.8		2.80072	1.77815	1.32222	0.866824	0.100224		0.54407	0.317881
CNCS 00581	94N0186	PD No OH	53.3744	0	1	1	3.295	20.5493	2.38746	2.37763	2.6836	-46	10	1.88		3.14675	2.79588	2.10721				0.217692	-0.0111774
CNCS 00635	94N0186	PD No OH	82.6804	1	1	0	9	9	2.55509	2.57287	2.8651	-150	8	0.04		2.51188	1.61278	1.39794	0.176471			0.832496	0.168902
CNCS 00638	94N0186	PD No OH	66.7159	1	1	1	25.04	1.67732	2.66242	3.12964	3.25708	-58	13	3.65		2.22789	1.4624	1.27875	-1.33333			1.71933	-0.0467928
CNCS 00649	94N0186	PD No OH	49.848	0	1	1	2.595	23.7033	2.67785	2.35812	2.8478	-59	33	3.79		3.95085	3.04179	3.53958	0.564103			0.350163	-0.0748579
CNCS 00661	94N0186	PD No OH	81.0404	1	1	1	4.795	11.4703	2.43388	2.3666	2.70257	-39	3	1.05		2.02119	0.845098	1.59106
CNCS 00663	94N0186	PD No OH	54.6886	0	1	1	3	45	2.95182	2.32838	3.04454	No BP change	No BP change	No BP change		2.50515	1.88649	1.59106	3			0.886364	-0.0017762
CNCS 00675	94N0186	PD No OH	68.9957	1	1	1	Square wave	Square wave	Square wave	Square wave	Square wave	Square wave	Square wave	Square wave		1.4624	1.41497	0.778151	0.2			0.726049	-0.00161644
CNCS 00676	94N0186	PD No OH	64.3066	1	1	1	5.395	7.97034	2.43388	2.3666	2.70257	-32	4	0.98		2.49831	1.44716	2.26717				0.923848	0.00349188
CNCS 00679	94N0186	PD No OH	48.6146	0	1	1	3.045	18.0164	2.74954	1.74615	2.79062	-32.2	7.5	1.95		2.79588	2.53656	1.23045	-2.33333			0.898026	-0.0418422
CNCS 00692	94N0186	PD No OH	60.9117	0	1	1	2.595	22.9364	2.68013	2.21796	2.80886	-55	20	3.24		2.98989	2.44248	1.68124				0.974161	-0.109091
CNCS 00695	94N0186	PD No OH	64.0657	1	1	1	Square wave	Square wave	Square wave	Square wave	Square wave	Square wave	Square wave	Square wave		1.74036	1.5563	0.845098	0.173913
CNCS 00726	94N0186	PD No OH	64.5914	1	1	1	Vent. Bigem.	Vent. Bigem.	Vent. Bigem.	Vent. Bigem.	Vent. Bigem.	Vent. Bigem.	Vent. Bigem.	Vent. Bigem.								0.137833	0.0451192
CNCS 00727	94N0186	PD No OH	57.6099	0	1	1	2.745	16.9545	2.65142	1.90313	2.72276	-40	10	1.37		2.26482	1.51851	0.954243				2.17011	-0.0594514
CNCS 00730	94N0186	PD No OH	41.4428	0	1	0	4.195	17.7116	2.56303	2.45364	2.8128	-50	35	5.77		2.97081	2.71012	2.35603				1.2893	0.0444315
CNCS 00736	94N0186	PD No OH	72.386	1	1	1	6.89	21.4311	2.31203	2.55067	2.74857	-62	7	2.42		3.02694	1.97772	1.39794				0.0664067	-0.0878723
CNCS 00740	94N0186	PD No OH	53.18	0	1	1	6	14	2.66652	2.18752	2.79029	-96	18	2.63		3.26647	2.33041	2.41664	0.571429			0.135736	0.0350533
CNCS 00742	94N0186	PD No OH	65.3607	1	0	1	1.9	22	2.17	1.86	2.35	-19	7	14.5		2.97174	2.4624	2.13988				0.935323	0.0149254
CNCS 00744	94N0186	PD No OH	70.2724	1	1	0	2.145	27.7389	2.44484	1.76789	2.52777	-59	6	0.537					0.565217			1.09899	0.129301
CNCS 00745	94N0186	PD No OH	64.5229	1	1	1	No. dec. BP	No. dec. BP	1.94663	0.495537	1.96174	-34.82	5.8665	1.2947		2.61278	1.5563	1				1.62926	0.239519
CNCS 00747	94N0186	PD No OH	67.7673	1	1	1	No BP change	No BP change	No BP change	No BP change	No BP change	-43	4	0.9108		2.40483	2.17898	1.60206				0.822581	0.0733634
CNCS 00753	94N0186	PD No OH	76.5311	1	0	1	5.445	7.38659	2.3774	2.26256	2.62479	-38	22	2.92		3.17811	2.84757	2.62221	-0.612903			-0.315784	0.024566
CNCS 00763	94N0186	PD No OH	78.0205	1	1	1	8.395	12.8624	3.05875	2.96595	3.31585	-76	3	0.49		2.23553	1.43136	1.04139				0.325282	-0.0413141
CNCS 01132	94N0186	PD No OH	43.308	0	1	0	3.09	17.3819	2.425	1.76672	2.51123	-59	34	4.64		3.40037	2.94988	2.30103	-10.8333	1.51786		1.15013	0.0787963
CNCS 01147	94N0186	PD No OH	57.5232	0	1	1	5.45	12.7839	3.05396	2.54292	3.17067	-45.05	15.3755	3.44		3.35507	3.17522	2.17898	-1.8			1.40799	-0.12081
CNCS 01271	94N0186	PD No OH	61.3655	0	1	0	2.095	10.6348	1.98403	1.42347	2.08957	-40	15	3		3.26245	2.82282	2.73957	-0.09375			0.676302	0.0669753
CNCS 01467	03N0004	PD No OH	45.2211	0	1	1	Ectopy	Ectopy	Ectopy	Ectopy	Ectopy	Ectopy	Ectopy	Indeterminate					0.0909091	0.114286		1.45652	0.0124805
CNCS 01501	03N0004	PD No OH	69.4812	1	1	1	5.79	12.8998	2.56817	2.67213	2.92429	-73.33	4.1944	0.6039		3.24748	2.42813	1.38021	-0.75	-0.288889	0.674185	1.05904	0.092367
CNCS 01534	03N0004	PD No OH	31.436	0	1	1	2.89	6.33218	1.5251	1.22455	1.70135	-21	14	8.57					-0.870968	-0.213333		2.1478	0.159988
CNCS 01637	03N0004	PD No OH	52.6899	0	1	0	4.99	16.3828	2.4855	2.31479	2.70951	-75	25	5.5		3.09691	2.96848	1.90849	0.659574	-0.119048		0.389375	0.10318
CNCS 01698	03N0004	PD No OH	63.7098	W	M	1	9.54	4.05346	2.24482	2.05043	2.45944	-60	7	0.8		2.43457	1.47712	1.44716	0.0714286			1.77456	-0.332507
CNCS 01707	03N0004	PD No OH	58.7926	0	1	1	3.59	10.4373	2.29714	1.64366	2.38424	-47	20	4.94		3.52088	2.79099	2.22272	-0.5	0.648649	0.0599168	1.5323	0.145163
CNCS 01798	03N0004	PD No OH	69.2074	1	1	1	8.59	15.7998	1.9929	2.61274	2.70615	-74	8	1.23		3.04411	2.52127	2.29688	0.444444	-0.862745		0.231954	0.0324976
CNCS 01908	03N0004	PD No OH	57.0502	0	1	0	2.99	7.96656	1.6388	1.42377	1.84549	-32	17	8.21		2.95856	2.09342	1.78533	-1.38462	2.125	0.528599	1.42456	0.0641189
CNCS 02022	03N0004	PD No OH	59.5359	1	1	1	6.04	3.31126	1.61768	1.662	1.94143	-26.8	17	7.54		2.79963	2.1406	1.39242	-0.454545	1.00684	Portapress	-0.0361528	-0.00479329
CNCS 02153	03N0004	PD No OH	78.0862	1	1	1	Square wave	Square wave	Square wave	Square wave	Square wave	Square wave	Square wave	Square wave			Afib, Pacer	Afib, Pacer	-0.511111	0.323529	-0.0611627	0.303531	-0.135185
CNCS 02196	03N0004	PD No OH	65.3265	1	1	1	1.64	0	2.02202	No data	1.85808	-65	7	0.55		2.76161	1.85592	0.886265	-9.5	0.388889	0.0381446	0.61481	0.0272357
CNCS 02251	09N0010	PD No OH	61.2485	0	1	1	6.74	10	2.5302	2.22011	2.70329	-54.72	12	3.21	52.68	3.55799	2.74974	2.17026	19	0.808427	0.0656584	3.24917	0.0759776
CNCS 02498	09N0010	PD No OH	61.3498	0	1	1	6.94	8.44169	2.17718	2.18005	2.47964	-47.5297	9.22295	4.5761	44.2	3.25983	2.66661	2.61679	0.318426	0.533166	-0.0694198	0.505083	0.150715
CNCS 02632	09N0010	PD No OH	56.7995	0	1	1	29.99	1.77459	2.05108	2.63501	2.73561	-64.4	12.4	0.99		3.38003	2.91855	2.65418	-1.94381	0.736382	0.471996	0.284553	0.037296
CNCS 02664	03N0004	PD No OH	43.7358	0	B	0	22	1.54	1.6721	2.41162	2.4843	-37	5	-0.92		3.09656	2.51188	2.34242	0.714286	-0.554054	-0.187988	0.593581	0.0642562
CNCS 02963	09N0010	PD No OH	50.8172	0	1	1	2.69	12.4535	1.85047	1.49744	2.00991	-39	13	3.74	15.196	2.72582	2.25568	1.81375	-3.12557	0.670227	0.0723366	1.00978	0.0564705
CNCS 03123	03N0004	PD No OH	75.3593	1	1	1	36.99	1.21303	1.95948	2.66077	2.73956	-56.72	5	1.2492		1.97313	0.955255	1.51061	-0.539665	7.22236	0.670193	1.44231	-0.14514
CNCS 03175	03N0004	PD No OH	46.1684	0	1	0	1.74	4.04023	1.22034	1.14179	1.48387	-39.32	3.258	2.91		3.09096	2.35025	2.10312	2.37377	-0.135935	0.115774	1.91549	0.247839
CNCS 03205	03N0004	PD No OH	64.6334	1	1	0	3.29	11.84	1.71181	1.662	1.98865	-44.9	12.415	2.323	31.49	2.82223	1.71922	1.43678	-0.636364	-0.0384615	0.0616438	0.917808	-0.0232558
CNCS 03213	03N0004	PD No OH	74.5462	1	1	1	5.29	5.63516	2.2641	2.01554	2.4584	-44.34	4.5908	1.24	38.8	2.99739	2.1959	1.74819	-0.408874	0.227531	0.272046	1.0271	0.0371717
CNCS 03309	03N0004	PD No OH	74.0041	1	B	1	16	3	2.46389	2.14922	2.63649	-43.72	15.7	2.84		2.8651	2.15229	1.44716	0.111111	-0.0833333	0.824758	0.207547	-0.0237562
CNCS 03511	03N0004	PD No OH	42.6794	0	1	0	1.79	21.8045	0.973543	1.46996	1.59015	-55.3	22.805	8.72	50.62	3.89823	3.39322	3.47756	-1.49783	5.75017	0.0254914	0.630872	-0.00391007
CNCS 03569	03N0004	PD No OH	77.1211	1	1	0	18.49	5.02975	3.01243	2.57458	3.14752	-89.4	6.5914	0.7174	13.31	2.22531	1.81954	0.928908	0.36439	0.732689	0.0365945	0.114224	-0.164948
CNCS 03802	18N0140	PD No OH	68.6242	1	1	0	5.19	6.40077	1.76498	1.79968	2.0837	-55	5	5.19	17.7	2.22272	1.11394	1.5563	0.183056	1.15014	0.27094	0.355284	-0.0467235
CNCS 03819	18N0140	PD No OH	64.7474	1	Seph.	1	5.79	7.86528	2.13157	1.75922	2.28516	-36.1	12.5076	4.09	44.5	3.25406	2.49276	2.79657	0.631402	0.213864	-0.0337777	1.04637	0.0296919
CNCS 03832	18N0140	PD No OH	50.8063	0	1	0	1.44	4.12	1.6066	0.11059	1.62024	-70.6562	7.94193	2.0808
CNCS 03834	18N0140	PD No OH	66.5708	1	1	0	3.49	8.33524	1.46127	1.79019	1.95718	-33.35	7.4156	3.51					0.631402	0.275081	1.39727	0.779959	0.130615
CNCS 03854	18N0140	PD No OH	73.4894	1	1	0	3.69	12.7209	2.21283	1.97997	2.41285	-87.07	14	1.78	40.1	3.00732	2.38917	1.97772	-0.329479	0.128548	No data	0.370991	-0.128604
CNCS 03880	18N0140	PD No OH	68.9103	1	0	0	10.94	5.20452	2.47934	2.07825	2.62457	-72.5938	12.7682	1.945	37.7	3.06408	2.83885	1.97772	2.50686	3.18293	0.157906	1.93403	0.115624
CNCS 03888	18N0140	PD No OH	64.9733	1	1	1	5.19	12.27	2.32946	2.06666	2.51867	-61.8406	21.9528	3.737	Poor EKG	Poor EKG	Poor EKG	Poor EKG	-1.87407	-0.363876	0.398416	0.823935	-0.0091488
CNCS 03913	18N0140	PD No OH	63.8795	1	1	1	4.69	8.61075	2.12302	1.85439	2.31018	-42.6	6.88	1.062	Poor EKG	Poor EKG	Poor EKG	Poor EKG	-1.08773	-0.236017	0.483382	0.264754	-0.0358713
Not in Database	94N0186	PD No OH	59.2225	0	1	1	No Chart record	No Chart record	No Chart record	No Chart record	No Chart record	-32	17	6.86		3.73783	3.36624	2.63849
CNCS 00302	03N0004	MSA-C	63.6277	1	1	1	11.44	2.65035	2.00911	1.85736	2.24086	-30	4.6	2.23		2.54864	1.943	1.79274	0.266667	1.83871		0.539967	0.170121
CNCS 00687	94N0186	MSA-C	43.655	0	0	1	9.59	6.2805	2.38752	2.46042	2.72653	-68.46	7	0.9106		2.0153	1.08874	1.40826				0.220521	0.0150197
CNCS 00756	94N0186	MSA-C	50.976	1	1	0	19.495	3.07771	2.7958	2.33188	2.92408	-98.64	23	1.3415		2.73799	2.23045	1.97313
CNCS 01433	03N0004	MSA-C	56.9555	0	B	0	9.64	10.5073	2.38811	2.51167	2.7553	-133	6	0.2		2.14613	0.90309	0.845098	0.0505051	-0.111111		No I.v.
CNCS 01464	03N0004	MSA-C	67.7372	1	1	1	45.49	2.58299	2.73077	2.86159	3.10212	-91	17	1.6		2.55388	2.23805	1.74429	0.243243	0.206349		0.396607	0.0549111
CNCS 01478	03N0004	MSA-C	64.7858	1	1	1	42.79	1.42767	2.4892	2.97506	3.09783	-86	11	1.38		2.55267	2.46464	2.12057	0.155172	0.428571
CNCS 01557	03N0004	MSA-C	58.5818	0	1	1	4.09	20.9095	2.29429	2.30612	2.60127	-100	4	0.08		1.97543	1.27646	1.54407	0.0574713	-0.56		0.0821256	0.0535932
CNCS 01738	03N0004	MSA-C	55.2005	0	O	0	16.99	3.93349	2.43179	2.5886	2.81826	-56	12	1.28		2.26715	1.23236	1.12992	0.25	-0.4	-0.277248	-0.106583	0.128134
CNCS 01788	03N0004	MSA-C	62.0068	1	1	0	26.99	1.887	1.4892	2.71091	2.73622	-56	11	3.14		2.57634	1.8451	2.14922	0.568182	-0.224138		-0.0190151	-0.0954835
CNCS 01800	03N0004	MSA-C	50.4148	0	1	1	23.29	3.22413	2.57538	2.62633	2.90263	-88	16	1.49		3.28511	2.36922	2.72997	0.367347	0.377358		0.258065	0.0373726
CNCS 01810	03N0004	MSA-C	51.0828	0	1	1	22.09	3.25487	2.54018	2.79232	2.98533	-66	11	2.07		3.33041	1.94939	1.61278	0.358974	-0.0212766		0.140674	-0.0038612
CNCS 01948	03N0004	MSA-C	56.282	0	1	0	8.19	5.37241	2.09714	2.63607	2.74636	-47	14	3.37		2.85431	2.58206	2.0607	1	-0.393939		0.431468	0.0193043
CNCS 02896	03N0004	MSA-C	45.4708	0	1	1	36.99	1.81	2.45647	2.55458	2.80932	-70.15	12.3	3.27	(Paced)	3.08493	2.76724	2.24095	0.258178	No data	-0.352576	0.143549	-0.0374984
CNCS 03021	03N0004	MSA-C	54.694	0	1	1	9.49	5.35722	2.31678	2.03871	2.50066	-52	19	3.73		3.27179	2.45281	2.04103	0.446577	-0.143773	-0.201281	0.171429	0.0758929
CNCS 03032	03N0004	MSA-C	59.5483	0	1	1	14.64	4.33265	2.2888	2.43035	2.66635	-58.19	7.6	1.0769	30.199	2.34635	1.21219	1.73078	0.436585	0.644875	-0.0780344	0.239158	0.102942
CNCS 03210	03N0004	MSA-C	53.859	0	1	1
CNCS 03472	03N0004	MSA-C	67.3867	1	1	0	7.44	13.1129	2.54484	1.90345	2.63416	-96.76	5.9827	0.7684		2.99388	2.06733	2.63058	0.402542	-0.506816	0.124409	0.531641	0.0463104
CNCS 03629	03N0004	MSA-C	48.2656	0	1	1	7.89	6.76046	2.58996	2.34659	2.78614			2.69	40	3.15769	2.71106	1.75656	0.445167	-0.369833	-0.118636	0.276031	-0.3376
CNCS 03902	18N0140	MSA-C	57.462	0	1	1	32.79	-0.430964	2.59896	3.13943	3.24938	-68.5844	17.2842	1.77	27.6	2.99778	2.0465	1.44295	0.825143	1.54047	1.80625	0.084691	0.0770557
CNCS 00013	03N0004	MSA-P	53.4867	0	1	1																-0.139325	0.055541
CNCS 00132	03N0004	MSA-P	63.1157	1	1	0	5.59	8.18784	2.1575	2.13028	2.44513	-17	9	6.35		3.13735	2.12385	2.83696				0.0237154	No data
CNCS 00335	03N0004	MSA-P	58.141	0	B	0	7.94	7.26826	2.5135	2.04739	2.64122	-48	4	0.1		2.37785	1.81358	0.724276	0.11	-0.958333		0.0685838	0.030691
CNCS 00368	03N0004	MSA-P	48.7666	0	O	1	5.39	10.2968	2.31867	1.9792	2.48232	-50	7	0.5		2.30428	1.6744	0.802774	0.722222	0.419355		1.25047	0.0316141
CNCS 00547	03N0004	MSA-P	44.6133	0	1	1	25.09	1.48147	2.12483	2.47992	2.63873	-27	13	6.52		2.9716	1.9952	2.16376	0.576923	-0.111111		-0.17514	-0.105561
CNCS 00652	94N0186	MSA-P	57.4209	1	H	0	22	3.44	2.11727	2.32015	2.53148	-137.2	27	0.2624
CNCS 00668	94N0186	MSA-P	47.0418	0	1	0	18.795	4.52886	2.97095	3.00016	3.28683	-112.3	6	0.22		3.03782	2.18469	2.19033
CNCS 00669	94N0186	MSA-P	69.9411	1	1	0	8.29	8.08203	2.43348	2.33024	2.68595	-32.81	4	0.7892
CNCS 00670	94N0186	MSA-P	65.0376	1	1	0	12.695	8.91296	2.96286	2.90216	3.2346	-138.09	4	0.277		1.96848	1.14613	1
CNCS 00673	94N0186	MSA-P	55.9617	1	1	0	3.44	8.99	2.76268	2.11394	2.85065	-41	12	0.5757		2.79309	1.80618	0.880814
CNCS 00677	94N0186	MSA-P	54.1711	1	1	1	4.495	30.8988	2.86809	2.20763	2.95393	-167.37	2.6	0.1028		1.65321	0.90309	1.38021
CNCS 00678	94N0186	MSA-P	63.8166	1	1	1	11.195	6.29656	2.41296	2.90888	3.02919	-94.44	11	0.3587		3.02284	1.92942	2.03342
CNCS 00694	94N0186	MSA-P	67.0691	0	1	0	9.99	5.5	2.89552	2.63246	3.08458	-42	5.5	-0.11		2.58995	1.74036	1.53148
CNCS 00758	94N0186	MSA-P	67.0335	0	1	0	15.89	4.52171	2.09688	2.45357	2.61189	-216.4	12.6	0.0001		2.35218	1.23045	1.79934				0.500677	0.0742924
CNCS 01187	94N0186	MSA-P	67.1978	1	1	1	5.04	10.8333	2.46642	2.10472	2.62322	-68.23	7	0.3442								0.682048	-0.132733
CNCS 01564	03N0004	MSA-P	76.4654	0	1	1	24.49	2.78277	2.24664	2.76261	2.87816	-44	Paced	No data					0.0172414	-0.578947		-0.0307263	-0.0641026
CNCS 01591	03N0004	MSA-P	46.1684	0	1	1	30.69	3.81558	2.63945	3.08747	3.21987	-130	10	1.12		2.13672	1.81954	0.954243	-0.0188679
CNCS 01594	03N0004	MSA-P	58.9678	1	1	0	6.69	12.6472	2.56437	2.17641	2.71337	-99	9	0.58		2.01912	1.43136	1.14613	0.469388	0.722222		1.36999	0.122357
CNCS 01609	03N0004	MSA-P	55.6632	1	1	0													0.107143			0.368978	0.0815682
CNCS 01615	03N0004	MSA-P	54.6886	1	O	0	3.545	10.3526	2.53993	2.18942	2.70015	-49.47	7	1.5047		2.24797	1.5682	1.38021	0.166667	0.541667	-0.277108	1.16428	0.098187
CNCS 01625	03N0004	MSA-P	63.4223	1	1	1	10.39	5.35	2.37219	2.43498	2.70574	-76	6	0.6		2.47129	1.82607	1.89763	0.366667	-0.0576923	0.0624163	0.29059	0.0573613
CNCS 01676	03N0004	MSA-P	61.4839	1	ME	1	Unable	Unable	Unable	Unable	Unable	Unable	Unable	Unable		2.65225	1.95424	1.50515	0.461538	-0.35		0.0847458	-0.0301831
CNCS 01716	03N0004	MSA-P	74.3053	1		1	30.19	2.42829	2.38678	2.69931	2.8716	-90	5	0.78		2.57936	1.636	1.0773		-0.3		-0.0190151	-0.0954835
CNCS 01731	03N0004	MSA-P	63.8385	0	1	1	7.395	7.167	2.83754	2.35038	2.96	-41.1	17	2.6235		2.80072	2.27646	1.32222				0.0533607	-0.0291439
CNCS 01988	03N0004	MSA-P	63.8658	1	H	1	11.59	6.75669	2.33208	2.49858	2.72429	Ectopics	Ectopics	Ectopics		2.71684	2.07918	2.16435	0.440678	No data		0.0140853	-0.010823
CNCS 02003	03N0004	MSA-P	52.0329	0	1	0	7.69	5.58388	2.2164	1.92174	2.39462	-51.2	17.9	3.04		2.45484	2.07918	1.54407	1.22222	0.215054		0.423197	0.19337
CNCS 02011	03N0004	MSA-P	57.8535		H																	1.1358	0.082774
CNCS 02071	03N0004	MSA-P	60.5996	1	1	1																0.978001	0.046901
CNCS 02077	03N0004	MSA-P	49.9357	1	1	0	21.19	5.53469	2.76252	2.80258	3.08404	-28	5	1.83		1.4624	0.60206	1	0.0769231	-0.0555556	-0.207171	0.641509	0.0536013
CNCS 02107	03N0004	MSA-P	65.3552	1	K	1																0.367071	-0.137609
CNCS 02359	03N0004	MSA-P	68.6078	1	H	0													0.0245957	0.053988	-0.0362329	0.0193314	-0.040304
CNCS 02705	03N0004	MSA-P	71.3374	0	G	1													-0.67129	0.620797		0.17621	-0.0446678
CNCS 02736	03N0004	MSA-P	56.3696	1	1	1	7.69	7.53056	2.17479	2.05683	2.42084	-58	6	1.03		3.00988	2.11727	2.13672	0.252744	1.06785	-0.181847	0.818966	-0.0533597
CNCS 02852	03N0004	MSA-P	47.1896	0	1	1	2.54	17.96	2.32222	1.49136	2.38202	-71	9	0.55		2.21219	1.716	0.853698	0.476613	1.12458	0.10055	1.22373	0.15067
CNCS 02910	03N0004	MSA-P	62.632																0.0624613	-0.0749829	-0.399954	-0.0867448	-0.0873278
CNCS 03007	03N0004	MSA-P	48.7502	0	1	1													0.232217	0.753309	-0.396948	0.331492	0.0229621
CNCS 03183	03N0004	MSA-P	47.0815	0	1	1	13.69	4.44631	2.23963	2.24746	2.54459	-69.28	9.5311	0.9522		2.20812	1.5682	1.26717	-0.744608	1.44731	0.27167	0.0495356	0.0128707
CNCS 03239	03N0004	MSA-P	48.4025	0	1	0	31.19	2.51876	2.72222	2.62655	2.97804	-104.3	30.53	2.34		2.88917	2.52517	2.34772	1.23219	1.21161	-0.168782	0.0840517	0.150228
CNCS 03340	03N0004	MSA-P	64.9227	1	B	0													0.145522	-0.462811	-0.466482	-0.350583	-0.134948
CNCS 03356	03N0004	MSA-P	73.5825	1	1	1													0.307003	1.13074	0.142562	0.57113	0.146677
CNCS 03427	03N0004	MSA-P	69.1773	1	ME	1													0.579703	-0.00723305	-0.146511	0.384955	0.0665345
CNCS 03434	03N0004	MSA-P	52.7995	0	1	1	6.49	5.36826	1.40348	2.03642	2.12733	-35.81	9.1413	3.201	40.69	2.97081	2.47276	2.27416	0.784926	1.00731	0.0811337	0.556701	0.0149457
CNCS 03549	03N0004	MSA-P	72.2136	1	1	0	19.49	2.17086	2.13792	2.67584	2.78636	-54.94	3	0.5		2.6721	1.9425	1.94349	8.94524	-0.509586	0.163875	0.030704	-0.0494907
CNCS 03684	03N0004	MSA-P	56.9582	0	1	1													0.173803	-0.422495	-0.209909
CNCS 03690	03N0004	MSA-P	63.8385	1	1	1													0.189046	0.869937	0.689181	0.382365	0.165064
CNCS 03749	03N0004	MSA-P	53.274	0	1	1	11.89	8.26849	2.61651	2.63126	2.92498	-151.781	9.46558	0.935					0.579081	-0.336892	0.282514	0.311406	0.13938
CNCS 03773	03N0004	MSA-P	69.9138																0.205579	-0.573057	-0.200901	0.296512	0.0978121
CNCS 03814	18N0140	MSA-P	52.2683	0	1	1													5.65318	-0.01563	1.09668	1.45778	0.136175
CNCS 03842	18N0140	MSA-P	57.0157	0	I	0	2.14	17.757	2.13012	1.53932	2.22931	-38.63	5.0416	0.895	16.059	2.33445	1.39794	1.44716	0.325225	-0.444052	1.64797	0.208529	-0.0272388
CNCS 03878	18N0140	MSA-P	56.5147	0	1	1	5.008	12.48	2.93227	2.99615	3.26642	-68.8124	5.98431	0.6428	20.75	2.67191	1.80079	2.38686	0.273985	1.34644	-0.713168	1.15233	-0.128992
CNCS 03907	18N0140	MSA-P	62.8528	1	1	0	7.39	7.87931	2.80378	2.86234	3.13507	-49.884	15.118	2.2105	40.42	3.22246	2.42488	2.47159	-0.482175	-0.739278	2.06505	0.300993	0.200105
CNCS 03929	18N0140	MSA-P	63.2252	1	1	0	19.84	1.93	2.45425	1.97327	2.57823	-53.887	4.2228	0.46	20.87	2.61384	2.53605	1.45818	0.965709	1.01704	0.759391	0.106307	-0.102342
CNCS 03944	18N0140	MSA-P	66.0479	1	H	0	9.59	1.93	1.91319	2.14503	2.34543	-36.665	1.4925	0.1674								-0.0491693	0.00530998

## Sheet: Data Dictionary
Column Header	Detail	Definition
PATID		Subject identification number
Protocol		NIH Clinical Protocol number
Group		Subject group assignment for this study
Age	years	Subject age at the time data obtained
≥60	Yes=1	Subject age ≥ 60 years old?
Race	W=1	Skin color (White=1)
Sex	M=1	Sex (Male=1)
Phys PRT	sec	Physiological measure: pressure recovery time after the Valsalva maneuver
Phys BRS-A	mmHg/sec	Physiological measure: baroreflex sensitivity-adrenergic
Phys Log Baro. Area II	mm Hg-sec	Physiological measure: log of baroreflex area in Phase II of the Valsalva maneuver
Phys Log Baro. Area III	mm Hg-sec	Physiological measure: log of baroreflex area in Phase III of the Valsalva maneuver
Phys Log Baro. Area Total	mm Hg-sec	Physiological measure: log of the sum of the baroreflex areas in Phases II and III of the Valsalva maneuver
Phys ∆BPs Val Phase II	mm Hg	Physiological measure: change in systolic blood pressure in Phase II of the Valsalva maneuver
Phys Inc. in HR Val	bpm	Physiological measure: increase in heart rate in Phase II of the Valsalva maneuver
Phys Baroslope	ms/mm Hg	Physiological measure: slope of the relationship between cardiac interbeat interval and systolic blood pressure during Phase II of the Valsalva maneuver
Phys SDRR	ms	Physiological measure: standard deviation of the electrocardiograph RR interval during supine rest
Phys log BL TP	ms^2	Physiological measure: log of total power of heart rate variability during supine rest
Phys log BL LF	ms^2	Physiological measure: log of low-frequency power of heart rate variability during supine rest
Phys log BL HF	ms^2	Physiological measure: log of high-frequency power of heart rate variability during supine rest
Phys ∆HR/∆BPs Ortho	bpm/mm Hg	Physiological measure: ratio of the change in heart rate to the change is systolic blood pressure during head-up tilt
Phys Fx∆FVR Ortho	Nexfin/Nova	Physiological measure: fractional changes in forearm vascular resistance during head-up tilt
Phys Fx∆TPR Ortho	Nexfin/Nova	Physiological measure: fractional changes in total peripheral resistance during head-up tilt
NC Fx∆NE Ortho		Neurochemical measure: fractional orthostatic increment in plasma norepinephrine
NC Fx∆DHPG Ortho		Neurochemical measure: fractional orthostatic increment in plasma 3,4-dihydroxyphenylglycol

## Sheet: Sympathoneural Spearman Matrix
	PRT	BRS-A	Log Baro. Area II	Log Baro. Area III	Log Baro. Area Total	∆BPs Val Phase II	Fx∆FVR Ortho	Fx∆TPR Ortho	Fx∆NE Ortho	Fx∆DHPG Ortho
PRT	r=1.00 p<0.0001	r=0.73 p<0.0001	r=0.45 p<0.0001	r=0.79 p<0.0001	r=0.69 p<0.0001	r=0.45 p<0.0001	r=0.20 p=0.00373	r=0.19 p=0.01031	r=0.48 p<0.0001	r=0.33 p<0.0001
BRS-A	r=0.73 p<0.0001	r=1.00 p<0.0001	r=0.04 p=0.43606	r=0.40 p<0.0001	r=0.25 p<0.0001	r=0.06 p=0.30680	r=0.11 p=0.09729	r=0.09 p=0.22770	r=0.34 p<0.0001	r=0.24 p<0.0001
Log Baro. Area II	r=0.45 p<0.0001	r=0.04 p=0.43606	r=1.00 p<0.0001	r=0.68 p<0.0001	r=0.89 p<0.0001	r=0.56 p<0.0001	r=0.20 p=0.00275	r=0.17 p=0.02460	r=0.23 p=0.00014	r=0.23 p<0.0001
Log Baro. Area III	r=0.79 p<0.0001	r=0.40 p<0.0001	r=0.68 p<0.0001	r=1.00 p<0.0001	r=0.92 p<0.0001	r=0.56 p<0.0001	r=0.29 p<0.0001	r=0.20 p=0.00819	r=0.45 p<0.0001	r=0.34 p<0.0001
Log Baro. Area Total	r=0.69 p<0.0001	r=0.25 p<0.0001	r=0.89 p<0.0001	r=0.92 p<0.0001	r=1.00 p<0.0001	r=0.61 p<0.0001	r=0.29 p<0.0001	r=0.21 p=0.00517	r=0.40 p<0.0001	r=0.32 p<0.0001
∆BPs Val Phase II	r=0.45 p<0.0001	r=0.06 p=0.30680	r=0.56 p<0.0001	r=0.56 p<0.0001	r=0.61 p<0.0001	r=1.00 p<0.0001	r=0.20 p=0.00326	r=0.23 p=0.00299	r=0.29 p<0.0001	r=0.19 p=0.00176
Fx∆FVR Ortho	r=0.20 p=0.00373	r=0.11 p=0.09729	r=0.20 p=0.00275	r=0.29 p<0.0001	r=0.29 p<0.0001	r=0.20 p=0.00326	r=1.00 p<0.0001	r=0.20 p=0.00431	r=0.30 p<0.0001	r=0.06 p=0.40328
Fx∆TPR Ortho	r=0.19 p=0.01031	r=0.09 p=0.22770	r=0.17 p=0.02460	r=0.20 p=0.00819	r=0.21 p=0.00517	r=0.23 p=0.00299	r=0.20 p=0.00431	r=1.00 p<0.0001	r=0.31 p<0.0001	r=0.14 p=0.05136
Fx∆NE Ortho	r=0.48 p<0.0001	r=0.34 p<0.0001	r=0.23 p=0.00014	r=0.45 p<0.0001	r=0.40 p<0.0001	r=0.29 p<0.0001	r=0.30 p<0.0001	r=0.31 p<0.0001	r=1.00 p<0.0001	r=0.40 p<0.0001
Fx∆DHPG Ortho	r=0.33 p<0.0001	r=0.24 p<0.0001	r=0.23 p<0.0001	r=0.34 p<0.0001	r=0.32 p<0.0001	r=0.19 p=0.00176	r=0.06 p=0.40328	r=0.14 p=0.05136	r=0.40 p<0.0001	r=1.00 p<0.0001

## Sheet: Cardiovagal Spearman Matrix
	Inc. in HR Val	Baroslope	SDRR	log BL LF	log BL HF	∆HR/∆BPs Ortho
Inc. in HR Val	r=1.00 p<0.0001	r=0.53 p<0.0001	r=0.29 p=0.01698	r=0.48 p<0.0001	r=0.28 p<0.0001	r=-0.05 p=0.44843
Baroslope	r=0.53 p<0.0001	r=1.00 p<0.0001	r=0.42 p=0.00029	r=0.62 p<0.0001	r=0.46 p<0.0001	r=-0.21 p=0.00063
SDRR	r=0.29 p=0.01698	r=0.42 p=0.00029	r=1.00 p<0.0001	r=0.61 p<0.0001	r=0.62 p<0.0001	r=-0.04 p=0.73755
log BL LF	r=0.48 p<0.0001	r=0.62 p<0.0001	r=0.61 p<0.0001	r=1.00 p<0.0001	r=0.73 p<0.0001	r=-0.05 p=0.45485
log BL HF	r=0.28 p<0.0001	r=0.46 p<0.0001	r=0.62 p<0.0001	r=0.73 p<0.0001	r=1.00 p<0.0001	r=0.02 p=0.72269
∆HR/∆BPs Ortho	r=-0.05 p=0.44843	r=-0.21 p=0.00063	r=-0.04 p=0.73755	r=-0.05 p=0.45485	r=0.02 p=0.72269	r=1.00 p<0.0001

## Sheet: Combined Spearman Matrix
	Phys PRT	Phys BRS-A	Phys Log Baro. Area II	Phys Log Baro. Area III	Phys Log Baro. Area Total	Phys ∆BPs Val Phase II	Phys Fx∆FVR Ortho	Phys Fx∆TPR Ortho	NC Fx∆NE Ortho	NC Fx∆DHPG Ortho	Phys Inc. in HR Val	Phys Baroslope	Phys SDRR	Phys log BL LF	Phys log BL HF	Phys ∆HR/∆BPs Ortho
Phys PRT	r=1.00 p<0.0001	r=0.74 p<0.0001	r=0.45 p<0.0001	r=0.78 p<0.0001	r=0.68 p<0.0001	r=0.45 p<0.0001	r=0.18 p=0.00711	r=0.19 p=0.01152	r=0.49 p<0.0001	r=0.34 p<0.0001	r=0.12 p=0.04269	r=0.36 p<0.0001	r=0.14 p=0.25882	r=0.39 p<0.0001	r=0.25 p<0.0001	r=-0.19 p=0.00289
Phys BRS-A	r=0.74 p<0.0001	r=1.00 p<0.0001	r=0.05 p=0.35236	r=0.40 p<0.0001	r=0.26 p<0.0001	r=0.07 p=0.24907	r=0.10 p=0.13325	r=0.10 p=0.20917	r=0.35 p<0.0001	r=0.25 p<0.0001	r=0.14 p=0.01720	r=0.16 p=0.00576	r=0.07 p=0.53792	r=0.24 p<0.0001	r=0.14 p=0.02110	r=-0.12 p=0.06167
Phys Log Baro. Area II	r=0.45 p<0.0001	r=0.05 p=0.35236	r=1.00 p<0.0001	r=0.68 p<0.0001	r=0.89 p<0.0001	r=0.56 p<0.0001	r=0.21 p=0.00209	r=0.16 p=0.03793	r=0.22 p=0.00020	r=0.24 p<0.0001	r=-0.01 p=0.85561	r=0.33 p<0.0001	r=0.10 p=0.39275	r=0.28 p<0.0001	r=0.24 p<0.0001	r=-0.23 p=0.00021
Phys Log Baro. Area III	r=0.78 p<0.0001	r=0.40 p<0.0001	r=0.68 p<0.0001	r=1.00 p<0.0001	r=0.92 p<0.0001	r=0.56 p<0.0001	r=0.29 p<0.0001	r=0.20 p=0.00989	r=0.46 p<0.0001	r=0.35 p<0.0001	r=0.16 p=0.00676	r=0.41 p<0.0001	r=0.17 p=0.16712	r=0.39 p<0.0001	r=0.23 p=0.00014	r=-0.17 p=0.00652
Phys Log Baro. Area Total	r=0.68 p<0.0001	r=0.26 p<0.0001	r=0.89 p<0.0001	r=0.92 p<0.0001	r=1.00 p<0.0001	r=0.60 p<0.0001	r=0.30 p<0.0001	r=0.21 p=0.00742	r=0.39 p<0.0001	r=0.33 p<0.0001	r=0.09 p=0.11723	r=0.41 p<0.0001	r=0.16 p=0.18890	r=0.37 p<0.0001	r=0.26 p<0.0001	r=-0.23 p=0.00029
Phys ∆BPs Val Phase II	r=0.45 p<0.0001	r=0.07 p=0.24907	r=0.56 p<0.0001	r=0.56 p<0.0001	r=0.60 p<0.0001	r=1.00 p<0.0001	r=0.20 p=0.00289	r=0.22 p=0.00374	r=0.29 p<0.0001	r=0.19 p=0.00155	r=-0.05 p=0.38693	r=0.51 p<0.0001	r=0.10 p=0.41345	r=0.29 p<0.0001	r=0.20 p=0.00115	r=-0.20 p=0.00130
Phys Fx∆FVR Ortho	r=0.18 p=0.00711	r=0.10 p=0.13325	r=0.21 p=0.00209	r=0.29 p<0.0001	r=0.30 p<0.0001	r=0.20 p=0.00289	r=1.00 p<0.0001	r=0.20 p=0.00550	r=0.31 p<0.0001	r=0.05 p=0.42347	r=0.14 p=0.03951	r=0.20 p=0.00431	r=0.00 p=0.97561	r=0.04 p=0.54361	r=-0.01 p=0.91705	r=-0.16 p=0.01616
Phys Fx∆TPR Ortho	r=0.19 p=0.01152	r=0.10 p=0.20917	r=0.16 p=0.03793	r=0.20 p=0.00989	r=0.21 p=0.00742	r=0.22 p=0.00374	r=0.20 p=0.00550	r=1.00 p<0.0001	r=0.31 p<0.0001	r=0.14 p=0.05455	r=0.13 p=0.08244	r=0.19 p=0.01424	r=-0.20 p=0.09962	r=0.09 p=0.27859	r=-0.08 p=0.30837	r=-0.17 p=0.01858
NC Fx∆NE Ortho	r=0.49 p<0.0001	r=0.35 p<0.0001	r=0.22 p=0.00020	r=0.46 p<0.0001	r=0.39 p<0.0001	r=0.29 p<0.0001	r=0.31 p<0.0001	r=0.31 p<0.0001	r=1.00 p<0.0001	r=0.40 p<0.0001	r=0.19 p=0.00170	r=0.29 p<0.0001	r=-0.03 p=0.79768	r=0.20 p=0.00122	r=0.08 p=0.19426	r=-0.08 p=0.20205
NC Fx∆DHPG Ortho	r=0.34 p<0.0001	r=0.25 p<0.0001	r=0.24 p<0.0001	r=0.35 p<0.0001	r=0.33 p<0.0001	r=0.19 p=0.00155	r=0.05 p=0.42347	r=0.14 p=0.05455	r=0.40 p<0.0001	r=1.00 p<0.0001	r=0.15 p=0.01301	r=0.22 p=0.00023	r=0.05 p=0.70569	r=0.26 p<0.0001	r=0.15 p=0.02291	r=0.02 p=0.74226
Phys Inc. in HR Val	r=0.12 p=0.04269	r=0.14 p=0.01720	r=-0.01 p=0.85561	r=0.16 p=0.00676	r=0.09 p=0.11723	r=-0.05 p=0.38693	r=0.14 p=0.03951	r=0.13 p=0.08244	r=0.19 p=0.00170	r=0.15 p=0.01301	r=1.00 p<0.0001	r=0.54 p<0.0001	r=0.29 p=0.01698	r=0.48 p<0.0001	r=0.28 p<0.0001	r=-0.05 p=0.43185
Phys Baroslope	r=0.36 p<0.0001	r=0.16 p=0.00576	r=0.33 p<0.0001	r=0.41 p<0.0001	r=0.41 p<0.0001	r=0.51 p<0.0001	r=0.20 p=0.00431	r=0.19 p=0.01424	r=0.29 p<0.0001	r=0.22 p=0.00023	r=0.54 p<0.0001	r=1.00 p<0.0001	r=0.42 p=0.00029	r=0.62 p<0.0001	r=0.47 p<0.0001	r=-0.20 p=0.00139
Phys SDRR	r=0.14 p=0.25882	r=0.07 p=0.53792	r=0.10 p=0.39275	r=0.17 p=0.16712	r=0.16 p=0.18890	r=0.10 p=0.41345	r=0.00 p=0.97561	r=-0.20 p=0.09962	r=-0.03 p=0.79768	r=0.05 p=0.70569	r=0.29 p=0.01698	r=0.42 p=0.00029	r=1.00 p<0.0001	r=0.61 p<0.0001	r=0.62 p<0.0001	r=-0.04 p=0.73755
Phys log BL LF	r=0.39 p<0.0001	r=0.24 p<0.0001	r=0.28 p<0.0001	r=0.39 p<0.0001	r=0.37 p<0.0001	r=0.29 p<0.0001	r=0.04 p=0.54361	r=0.09 p=0.27859	r=0.20 p=0.00122	r=0.26 p<0.0001	r=0.48 p<0.0001	r=0.62 p<0.0001	r=0.61 p<0.0001	r=1.00 p<0.0001	r=0.73 p<0.0001	r=-0.04 p=0.55558
Phys log BL HF	r=0.25 p<0.0001	r=0.14 p=0.02110	r=0.24 p<0.0001	r=0.23 p=0.00014	r=0.26 p<0.0001	r=0.20 p=0.00115	r=-0.01 p=0.91705	r=-0.08 p=0.30837	r=0.08 p=0.19426	r=0.15 p=0.02291	r=0.28 p<0.0001	r=0.47 p<0.0001	r=0.62 p<0.0001	r=0.73 p<0.0001	r=1.00 p<0.0001	r=0.02 p=0.70641
Phys ∆HR/∆BPs Ortho	r=-0.19 p=0.00289	r=-0.12 p=0.06167	r=-0.23 p=0.00021	r=-0.17 p=0.00652	r=-0.23 p=0.00029	r=-0.20 p=0.00130	r=-0.16 p=0.01616	r=-0.17 p=0.01858	r=-0.08 p=0.20205	r=0.02 p=0.74226	r=-0.05 p=0.43185	r=-0.20 p=0.00139	r=-0.04 p=0.73755	r=-0.04 p=0.55558	r=0.02 p=0.70641	r=1.00 p<0.0001

## Sheet: Sympathoneural Pearson Matrix
Sympathoneural: Directionality-Adjusted Pearson Correlation Matrix
	PRT	BRS-A	Log Baro. Area II	Log Baro. Area III	Log Baro. Area Total	∆BPs Val Phase II	Fx∆FVR Ortho	Fx∆TPR Ortho	Fx∆NE Ortho	Fx∆DHPG Ortho
PRT	r=1.00 p<0.0001	r=0.51 p<0.0001	r=0.32 p<0.0001	r=0.64 p<0.0001	r=0.55 p<0.0001	r=0.32 p<0.0001	r=0.01 p=0.90178	r=0.12 p=0.11517	r=0.36 p<0.0001	r=0.17 p=0.00479
BRS-A	r=0.51 p<0.0001	r=1.00 p<0.0001	r=-0.00 p=0.93280	r=0.28 p<0.0001	r=0.13 p=0.01703	r=-0.05 p=0.42389	r=0.03 p=0.63060	r=0.01 p=0.86663	r=0.12 p=0.03827	r=0.10 p=0.10421
Log Baro. Area II	r=0.32 p<0.0001	r=-0.00 p=0.93280	r=1.00 p<0.0001	r=0.67 p<0.0001	r=0.90 p<0.0001	r=0.50 p<0.0001	r=0.15 p=0.03212	r=0.06 p=0.41518	r=0.19 p=0.00134	r=0.11 p=0.06017
Log Baro. Area III	r=0.64 p<0.0001	r=0.28 p<0.0001	r=0.67 p<0.0001	r=1.00 p<0.0001	r=0.90 p<0.0001	r=0.48 p<0.0001	r=0.14 p=0.04614	r=0.13 p=0.08814	r=0.37 p<0.0001	r=0.19 p=0.00169
Log Baro. Area Total	r=0.55 p<0.0001	r=0.13 p=0.01703	r=0.90 p<0.0001	r=0.90 p<0.0001	r=1.00 p<0.0001	r=0.54 p<0.0001	r=0.16 p=0.02066	r=0.10 p=0.21000	r=0.31 p<0.0001	r=0.17 p=0.00390
∆BPs Val Phase II	r=0.32 p<0.0001	r=-0.05 p=0.42389	r=0.50 p<0.0001	r=0.48 p<0.0001	r=0.54 p<0.0001	r=1.00 p<0.0001	r=0.15 p=0.02654	r=0.16 p=0.04170	r=0.26 p=0.00001	r=0.07 p=0.22846
Fx∆FVR Ortho	r=0.01 p=0.90178	r=0.03 p=0.63060	r=0.15 p=0.03212	r=0.14 p=0.04614	r=0.16 p=0.02066	r=0.15 p=0.02654	r=1.00 p<0.0001	r=0.04 p=0.56813	r=0.19 p=0.00412	r=-0.05 p=0.42419
Fx∆TPR Ortho	r=0.12 p=0.11517	r=0.01 p=0.86663	r=0.06 p=0.41518	r=0.13 p=0.08814	r=0.10 p=0.21000	r=0.16 p=0.04170	r=0.04 p=0.56813	r=1.00 p<0.0001	r=0.14 p=0.06129	r=0.15 p=0.03628
Fx∆NE Ortho	r=0.36 p<0.0001	r=0.12 p=0.03827	r=0.19 p=0.00134	r=0.37 p<0.0001	r=0.31 p<0.0001	r=0.26 p=0.00001	r=0.19 p=0.00412	r=0.14 p=0.06129	r=1.00 p<0.0001	r=0.23 p=0.00004
Fx∆DHPG Ortho	r=0.17 p=0.00479	r=0.10 p=0.10421	r=0.11 p=0.06017	r=0.19 p=0.00169	r=0.17 p=0.00390	r=0.07 p=0.22846	r=-0.05 p=0.42419	r=0.15 p=0.03628	r=0.23 p=0.00004	r=1.00 p<0.0001

## Sheet: Cardiovagal Pearson Matrix
Cardiovagal: Directionality-Adjusted Pearson Correlation Matrix
	Inc. in HR Val	Baroslope	SDRR	log BL LF	log BL HF	∆HR/∆BPs Ortho
Inc. in HR Val	r=1.00 p<0.0001	r=0.36 p<0.0001	r=0.30 p=0.01110	r=0.38 p<0.0001	r=0.27 p<0.0001	r=0.06 p=0.31314
Baroslope	r=0.36 p<0.0001	r=1.00 p<0.0001	r=0.41 p=0.00050	r=0.48 p<0.0001	r=0.42 p<0.0001	r=-0.31 p<0.0001
SDRR	r=0.30 p=0.01110	r=0.41 p=0.00050	r=1.00 p<0.0001	r=0.57 p<0.0001	r=0.61 p<0.0001	r=0.11 p=0.36452
log BL LF	r=0.38 p<0.0001	r=0.48 p<0.0001	r=0.57 p<0.0001	r=1.00 p<0.0001	r=0.73 p<0.0001	r=0.01 p=0.86166
log BL HF	r=0.27 p<0.0001	r=0.42 p<0.0001	r=0.61 p<0.0001	r=0.73 p<0.0001	r=1.00 p<0.0001	r=0.02 p=0.75342
∆HR/∆BPs Ortho	r=0.06 p=0.31314	r=-0.31 p<0.0001	r=0.11 p=0.36452	r=0.01 p=0.86166	r=0.02 p=0.75342	r=1.00 p<0.0001

## Sheet: Combined Pearson Matrix
	Phys PRT	Phys BRS-A	Phys Log Baro. Area II	Phys Log Baro. Area III	Phys Log Baro. Area Total	Phys ∆BPs Val Phase II	Phys Fx∆FVR Ortho	Phys Fx∆TPR Ortho	NC Fx∆NE Ortho	NC Fx∆DHPG Ortho	Phys Inc. in HR Val	Phys Baroslope	Phys SDRR	Phys log BL LF	Phys log BL HF	Phys ∆HR/∆BPs Ortho
Phys PRT	r=1.00 p<0.0001	r=0.51 p<0.0001	r=0.32 p<0.0001	r=0.64 p<0.0001	r=0.55 p<0.0001	r=0.32 p<0.0001	r=0.01 p=0.90178	r=0.12 p=0.11517	r=0.36 p<0.0001	r=0.17 p=0.00479	r=0.07 p=0.23181	r=0.30 p<0.0001	r=0.14 p=0.24182	r=0.32 p<0.0001	r=0.23 p=0.00009	r=-0.07 p=0.23843
Phys BRS-A	r=0.51 p<0.0001	r=1.00 p<0.0001	r=-0.00 p=0.93280	r=0.28 p<0.0001	r=0.13 p=0.01703	r=-0.05 p=0.42389	r=0.03 p=0.63060	r=0.01 p=0.86663	r=0.12 p=0.03827	r=0.10 p=0.10421	r=0.10 p=0.08808	r=0.09 p=0.11240	r=0.09 p=0.43269	r=0.15 p=0.01170	r=0.11 p=0.07494	r=0.02 p=0.79102
Phys Log Baro. Area II	r=0.32 p<0.0001	r=-0.00 p=0.93280	r=1.00 p<0.0001	r=0.67 p<0.0001	r=0.90 p<0.0001	r=0.50 p<0.0001	r=0.15 p=0.03212	r=0.06 p=0.41518	r=0.19 p=0.00134	r=0.11 p=0.06017	r=-0.04 p=0.46422	r=0.44 p<0.0001	r=0.12 p=0.30971	r=0.31 p<0.0001	r=0.27 p<0.0001	r=-0.26 p=0.00003
Phys Log Baro. Area III	r=0.64 p<0.0001	r=0.28 p<0.0001	r=0.67 p<0.0001	r=1.00 p<0.0001	r=0.90 p<0.0001	r=0.48 p<0.0001	r=0.14 p=0.04614	r=0.13 p=0.08814	r=0.37 p<0.0001	r=0.19 p=0.00169	r=0.09 p=0.12010	r=0.38 p<0.0001	r=0.15 p=0.19932	r=0.41 p<0.0001	r=0.24 p=0.00006	r=-0.11 p=0.08207
Phys Log Baro. Area Total	r=0.55 p<0.0001	r=0.13 p=0.01703	r=0.90 p<0.0001	r=0.90 p<0.0001	r=1.00 p<0.0001	r=0.54 p<0.0001	r=0.16 p=0.02066	r=0.10 p=0.21000	r=0.31 p<0.0001	r=0.17 p=0.00390	r=0.03 p=0.61183	r=0.45 p<0.0001	r=0.16 p=0.19233	r=0.38 p<0.0001	r=0.27 p<0.0001	r=-0.18 p=0.00317
Phys ∆BPs Val Phase II	r=0.32 p<0.0001	r=-0.05 p=0.42389	r=0.50 p<0.0001	r=0.48 p<0.0001	r=0.54 p<0.0001	r=1.00 p<0.0001	r=0.15 p=0.02654	r=0.16 p=0.04170	r=0.26 p=0.00001	r=0.07 p=0.22846	r=-0.06 p=0.28981	r=0.47 p<0.0001	r=0.08 p=0.50065	r=0.31 p<0.0001	r=0.21 p=0.00040	r=-0.08 p=0.17931
Phys Fx∆FVR Ortho	r=0.01 p=0.90178	r=0.03 p=0.63060	r=0.15 p=0.03212	r=0.14 p=0.04614	r=0.16 p=0.02066	r=0.15 p=0.02654	r=1.00 p<0.0001	r=0.04 p=0.56813	r=0.19 p=0.00412	r=-0.05 p=0.42419	r=0.06 p=0.38389	r=0.14 p=0.03787	r=0.04 p=0.72763	r=0.01 p=0.92396	r=0.04 p=0.53570	r=-0.09 p=0.16004
Phys Fx∆TPR Ortho	r=0.12 p=0.11517	r=0.01 p=0.86663	r=0.06 p=0.41518	r=0.13 p=0.08814	r=0.10 p=0.21000	r=0.16 p=0.04170	r=0.04 p=0.56813	r=1.00 p<0.0001	r=0.14 p=0.06129	r=0.15 p=0.03628	r=0.08 p=0.28965	r=0.07 p=0.34715	r=-0.07 p=0.56074	r=0.10 p=0.21104	r=-0.04 p=0.59144	r=-0.03 p=0.68160
NC Fx∆NE Ortho	r=0.36 p<0.0001	r=0.12 p=0.03827	r=0.19 p=0.00134	r=0.37 p<0.0001	r=0.31 p<0.0001	r=0.26 p=0.00001	r=0.19 p=0.00412	r=0.14 p=0.06129	r=1.00 p<0.0001	r=0.23 p=0.00004	r=0.06 p=0.33332	r=0.24 p=0.00006	r=-0.03 p=0.81715	r=0.18 p=0.00505	r=0.07 p=0.29646	r=-0.08 p=0.18290
NC F ∆DHPG Ortho	r=0.17 p=0.00479	r=0.10 p=0.10421	r=0.11 p=0.06017	r=0.19 p=0.00169	r=0.17 p=0.00390	r=0.07 p=0.22846	r=-0.05 p=0.42419	r=0.15 p=0.03628	r=0.23 p=0.00004	r=1.00 p<0.0001	r=0.08 p=0.17915	r=0.11 p=0.07084	r=0.02 p=0.88199	r=0.16 p=0.01041	r=0.11 p=0.09567	r=-0.01 p=0.87575
Phys Inc. in HR Val	r=0.07 p=0.23181	r=0.10 p=0.08808	r=-0.04 p=0.46422	r=0.09 p=0.12010	r=0.03 p=0.61183	r=-0.06 p=0.28981	r=0.06 p=0.38389	r=0.08 p=0.28965	r=0.06 p=0.33332	r=0.08 p=0.17915	r=1.00 p<0.0001	r=0.36 p<0.0001	r=0.30 p=0.01110	r=0.38 p<0.0001	r=0.27 p<0.0001	r=0.06 p=0.31314
Phys Baroslope	r=0.30 p<0.0001	r=0.09 p=0.11240	r=0.44 p<0.0001	r=0.38 p<0.0001	r=0.45 p<0.0001	r=0.47 p<0.0001	r=0.14 p=0.03787	r=0.07 p=0.34715	r=0.24 p=0.00006	r=0.11 p=0.07084	r=0.36 p<0.0001	r=1.00 p<0.0001	r=0.41 p=0.00050	r=0.48 p<0.0001	r=0.42 p<0.0001	r=-0.31 p<0.0001
Phys SDRR	r=0.14 p=0.24182	r=0.09 p=0.43269	r=0.12 p=0.30971	r=0.15 p=0.19932	r=0.16 p=0.19233	r=0.08 p=0.50065	r=0.04 p=0.72763	r=-0.07 p=0.56074	r=-0.03 p=0.81715	r=0.02 p=0.88199	r=0.30 p=0.01110	r=0.41 p=0.00050	r=1.00 p<0.0001	r=0.57 p<0.0001	r=0.61 p<0.0001	r=0.11 p=0.36452
Phys log BL LF	r=0.32 p<0.0001	r=0.15 p=0.01170	r=0.31 p<0.0001	r=0.41 p<0.0001	r=0.38 p<0.0001	r=0.31 p<0.0001	r=0.01 p=0.92396	r=0.10 p=0.21104	r=0.18 p=0.00505	r=0.16 p=0.01041	r=0.38 p<0.0001	r=0.48 p<0.0001	r=0.57 p<0.0001	r=1.00 p<0.0001	r=0.73 p<0.0001	r=0.01 p=0.86166
Phys log BL HF	r=0.23 p=0.00009	r=0.11 p=0.07494	r=0.27 p<0.0001	r=0.24 p=0.00006	r=0.27 p<0.0001	r=0.21 p=0.00040	r=0.04 p=0.53570	r=-0.04 p=0.59144	r=0.07 p=0.29646	r=0.11 p=0.09567	r=0.27 p<0.0001	r=0.42 p<0.0001	r=0.61 p<0.0001	r=0.73 p<0.0001	r=1.00 p<0.0001	r=0.02 p=0.75342
Phys ∆HR/∆BPs Ortho	r=-0.07 p=0.23843	r=0.02 p=0.79102	r=-0.26 p=0.00003	r=-0.11 p=0.08207	r=-0.18 p=0.00317	r=-0.08 p=0.17931	r=-0.09 p=0.16004	r=-0.03 p=0.68160	r=-0.08 p=0.18290	r=-0.01 p=0.87575	r=0.06 p=0.31314	r=-0.31 p<0.0001	r=0.11 p=0.36452	r=0.01 p=0.86166	r=0.02 p=0.75342	r=1.00 p<0.0001
